# Supplementary material for: Regulation of the one carbon folate cycle as a shared metabolic signature of longevity
Source: PubMed Central journal article supplement (PMC8190293; doi:10.1038/s41467-021-23856-9), 2021-06-09
Supplement: 41467_2021_23856_MOESM1_ESM.pdf [file 41467_2021_23856_MOESM1_ESM.pdf]

## Supplementary Information

Regulation of the one carbon folate cycle as a shared metabolic signature of longevity

**Authors:** Andrea Annibal<sup>1</sup>, Rebecca George Tharyan<sup>1</sup>, Maribel Schoenewolff<sup>1</sup>, Hannah Tam<sup>1</sup>, Christian Latza<sup>1</sup>, Markus Max Karl Auler<sup>1</sup>, Adam Antebi<sup>1,2,3</sup>

<sup>1</sup>Max Planck Institute for Biology of Ageing, Joseph Stelzmann Str. 9b, 50931, Cologne, Germany

<sup>2</sup>Cologne Excellence Cluster on Cellular Stress Responses in Aging-Associated Diseases (CECAD), University of Cologne, 50931, Cologne, Germany

<sup>3</sup>Corresponding author

# Supplementary Fig. 1

**a**

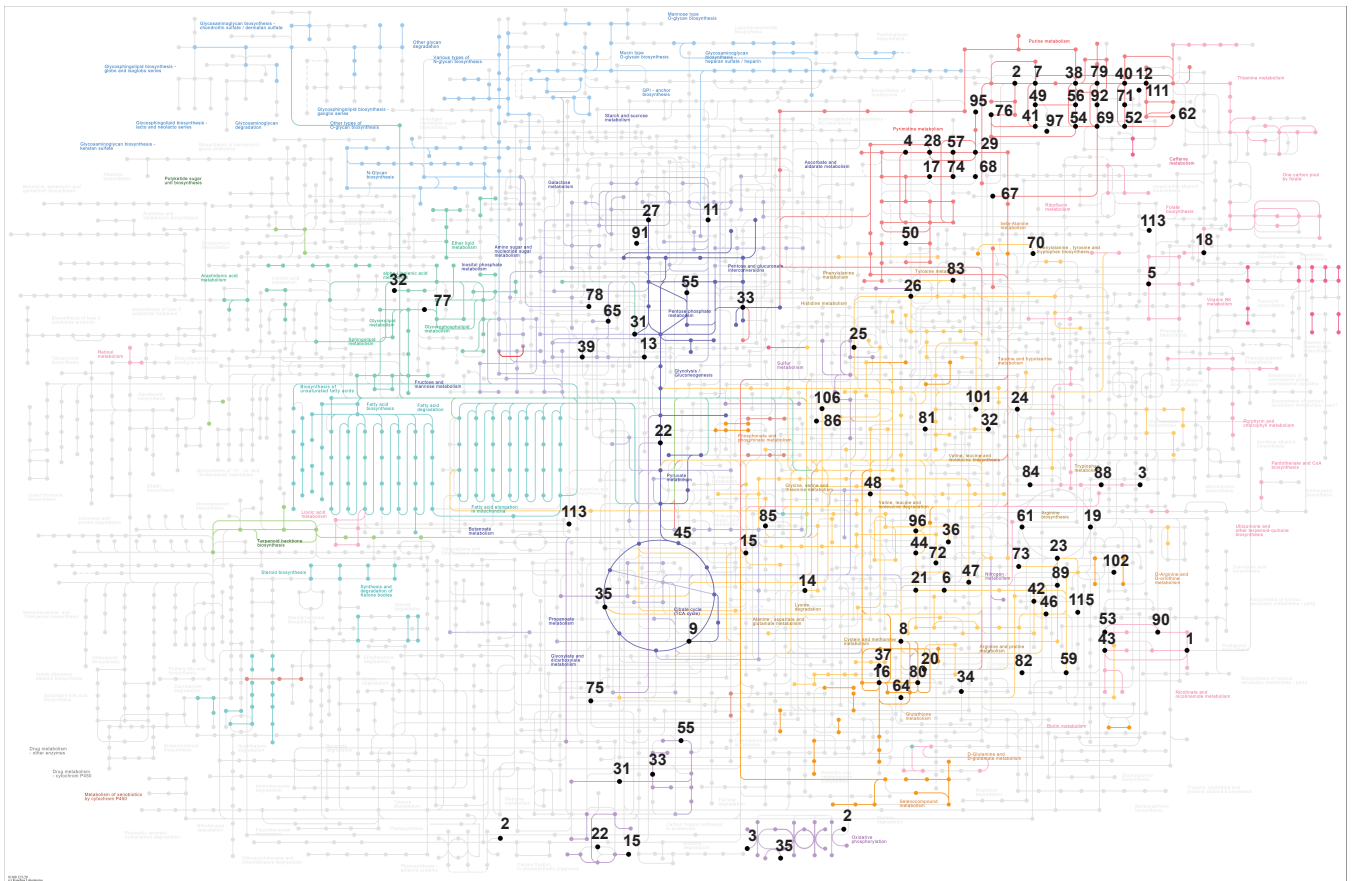

**b**

Scores Plot

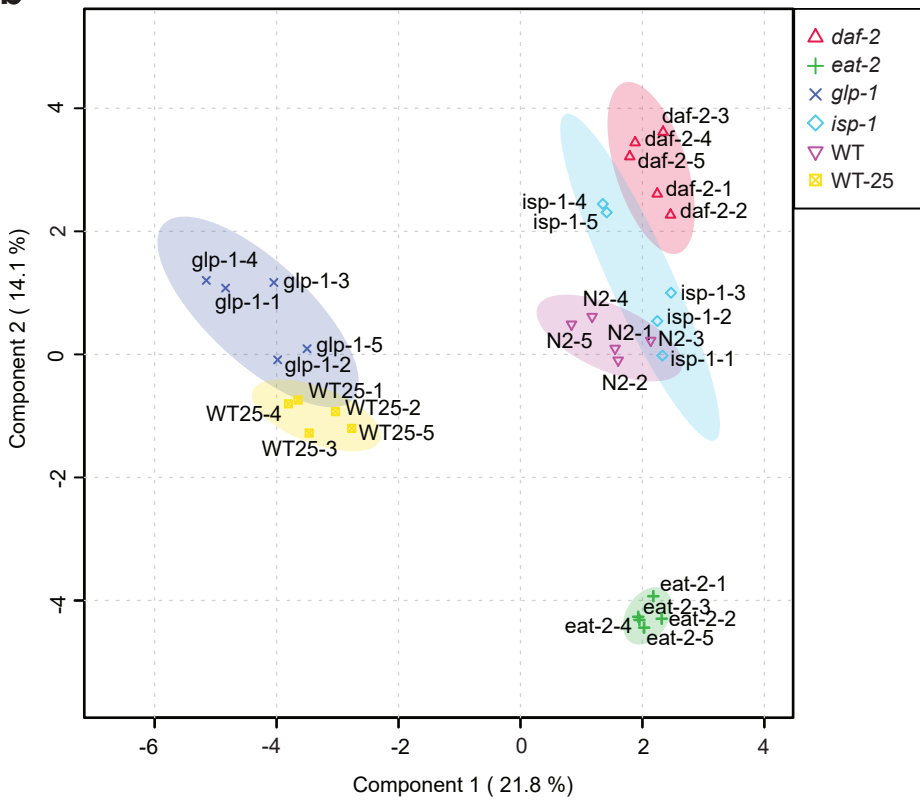

C

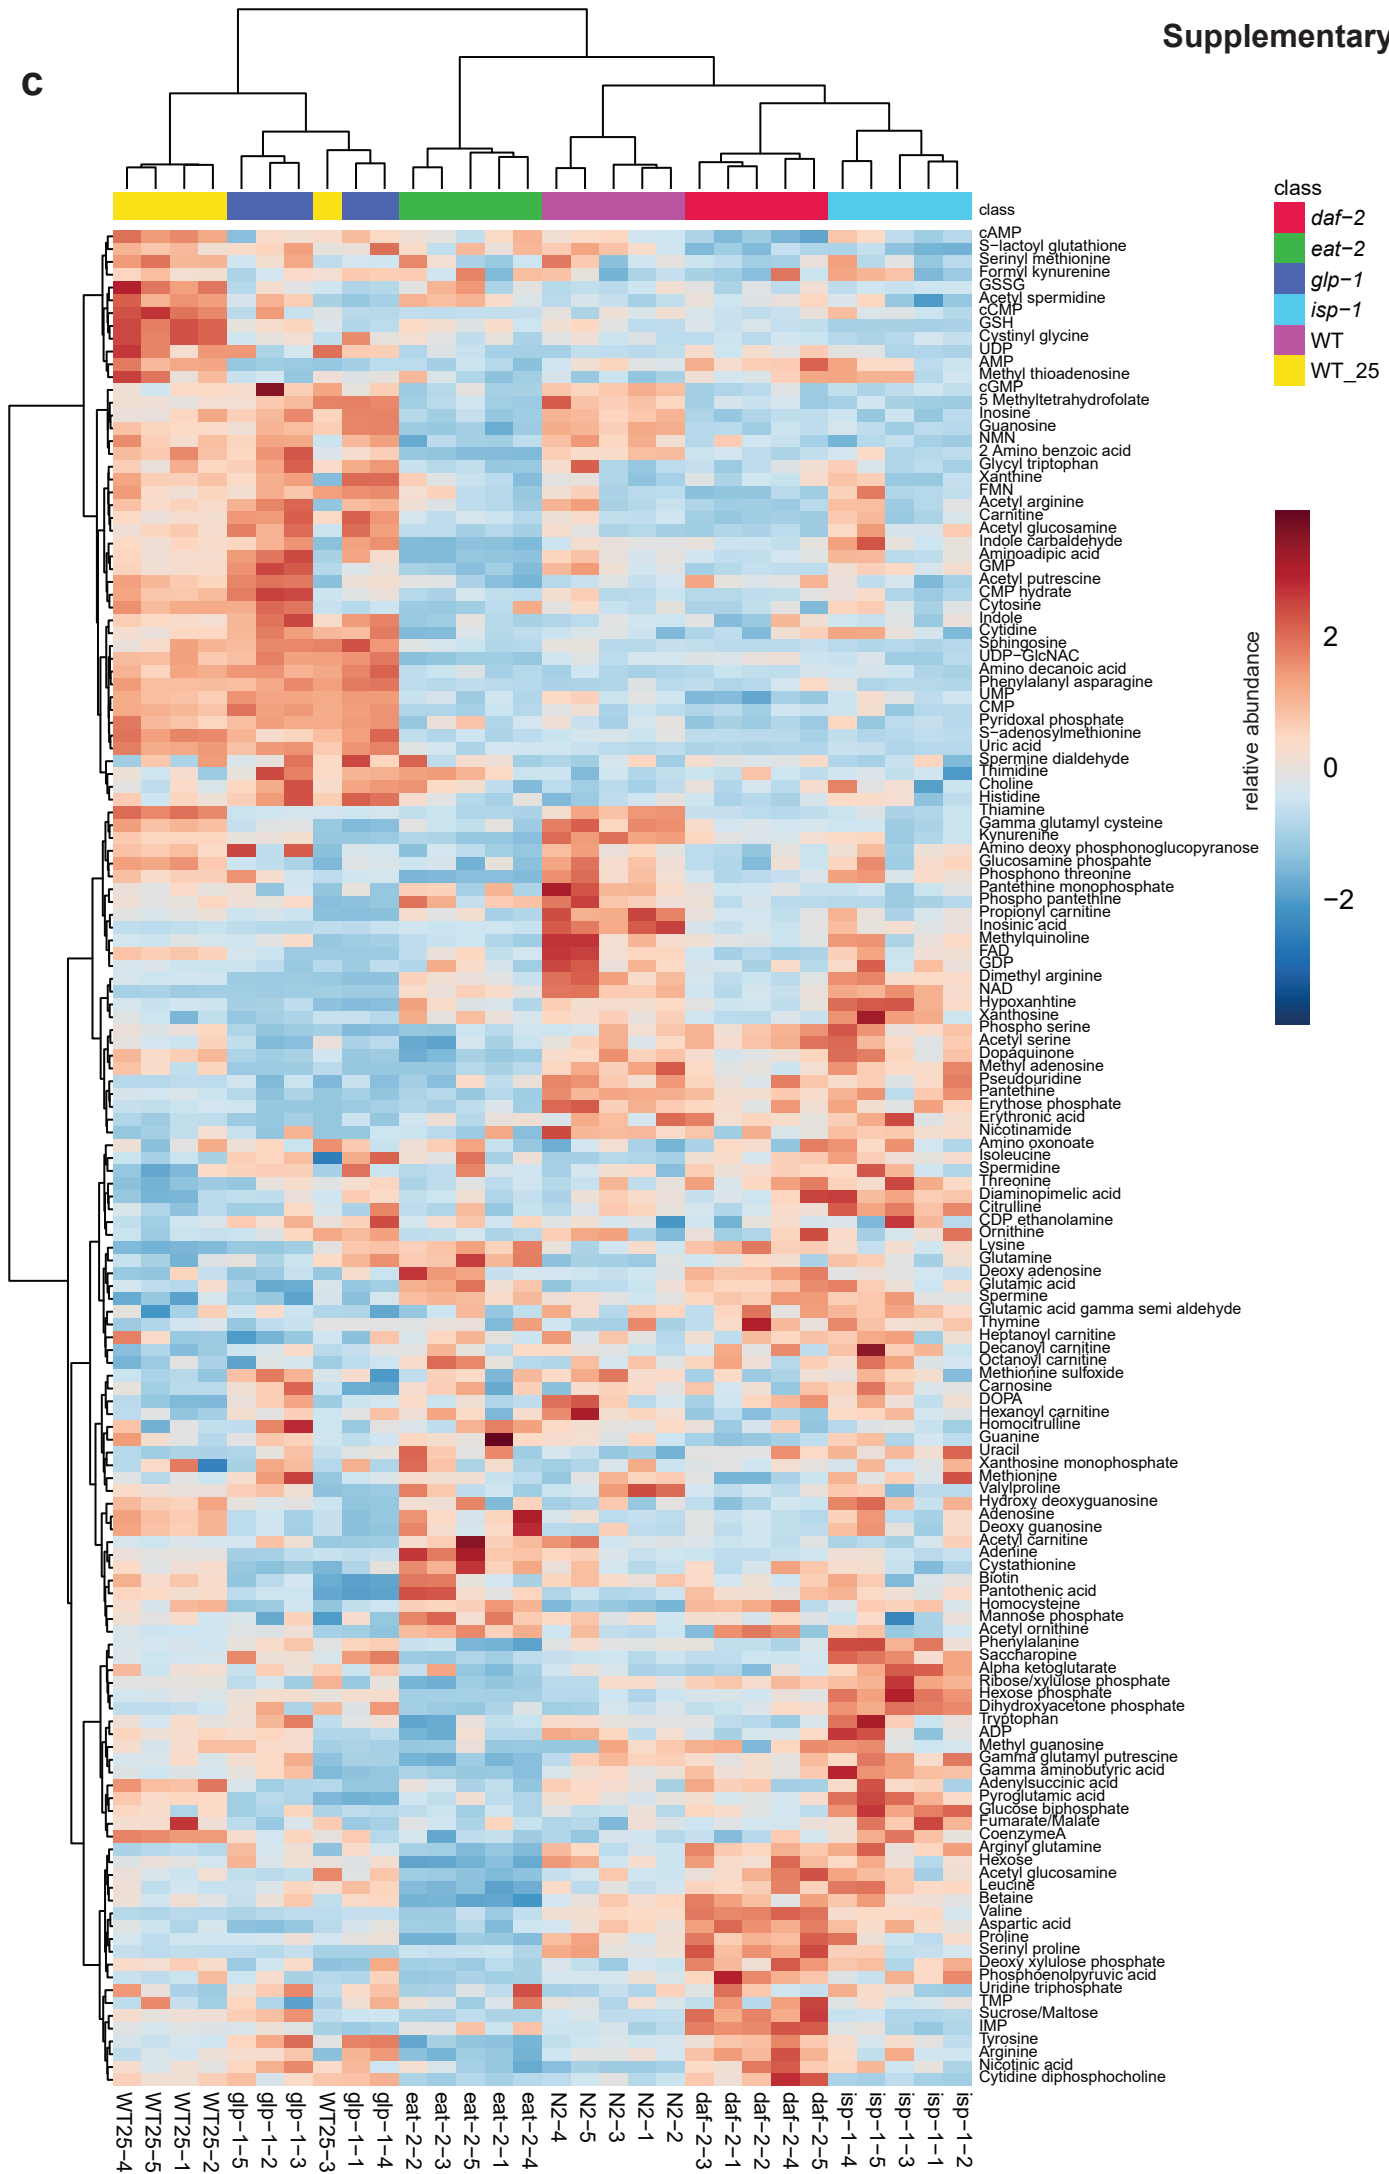

d

*glp-1*/WT-25

Overview of Enriched Metabolite Sets (Top 25)

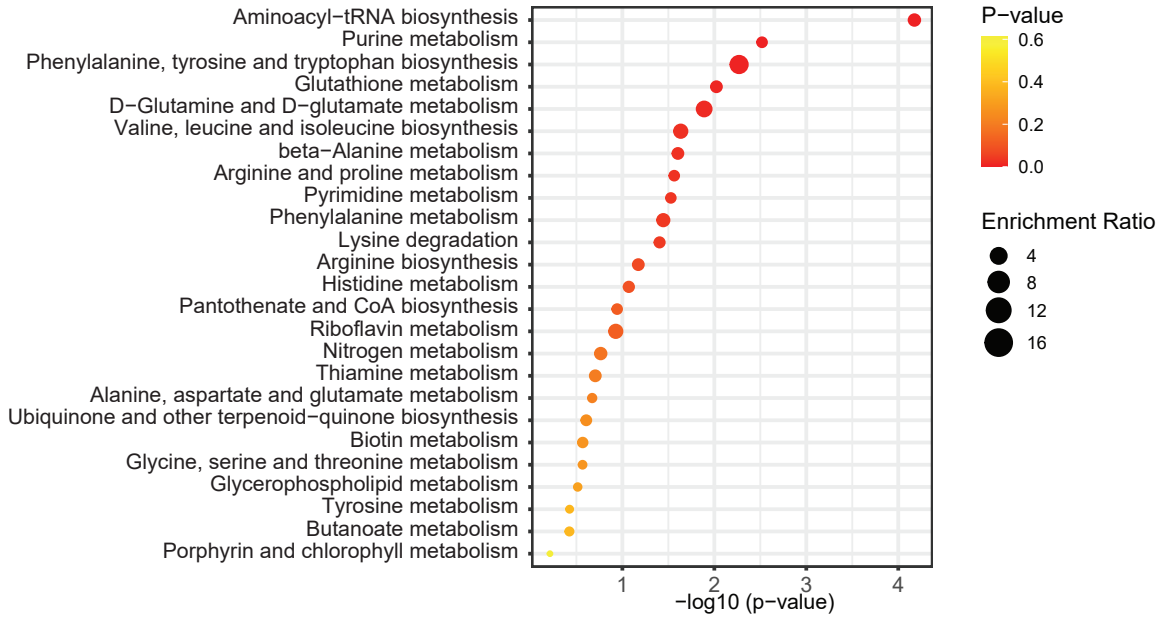

e

*daf-2*/ WT

Overview of Enriched Metabolite Sets (Top 25)

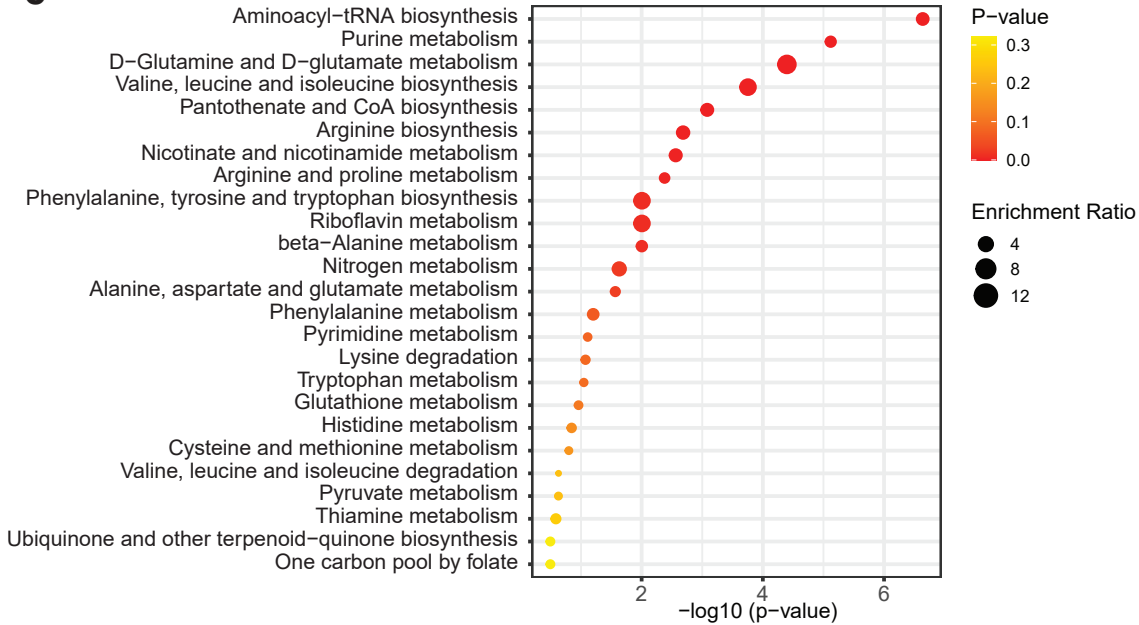

# Supplementary Fig. 1

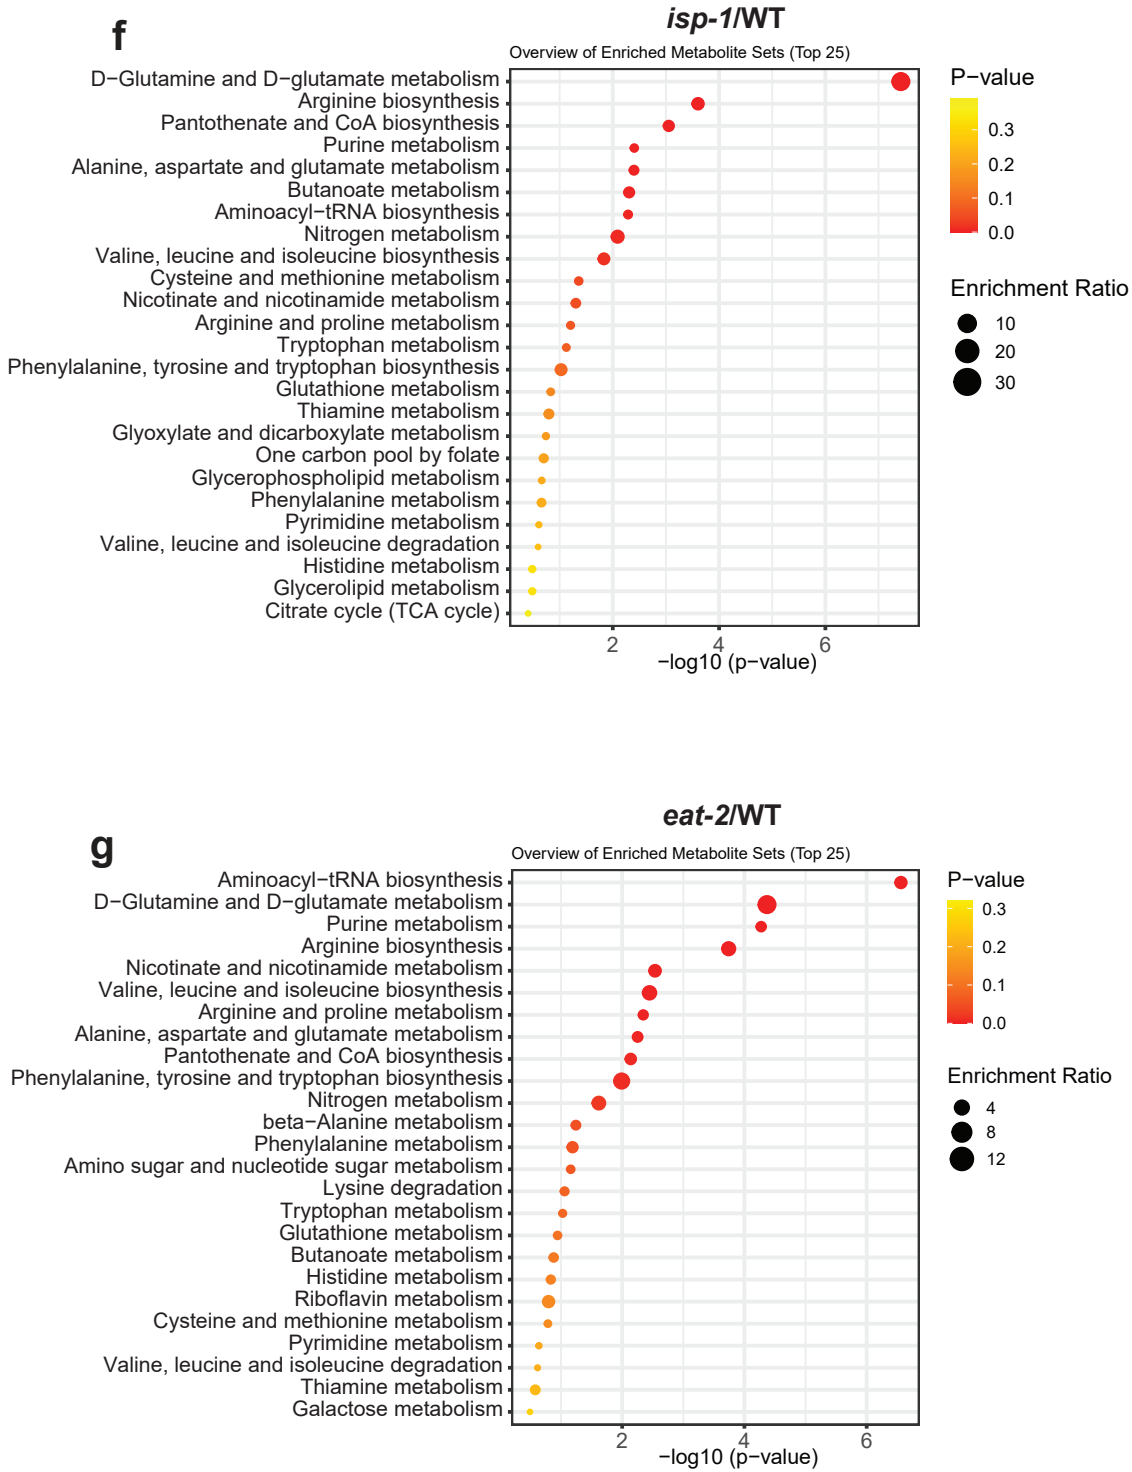

## Supplementary Fig. 2

### Amino acids

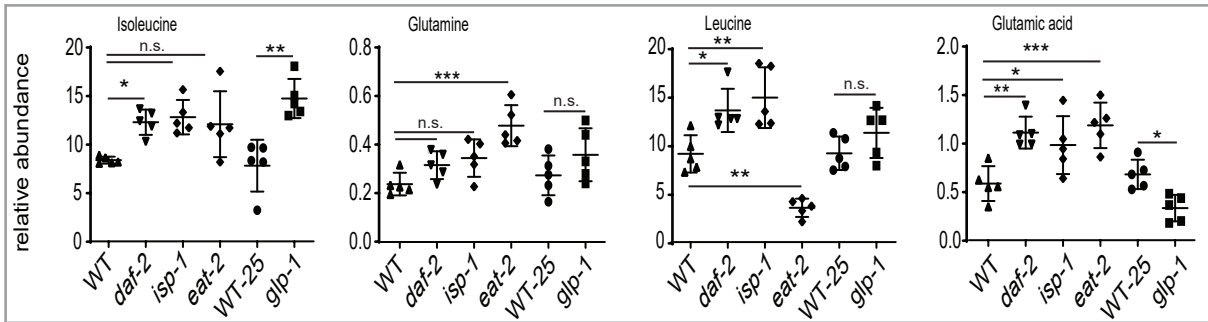

### Folic acid/ Methionine Metabolism

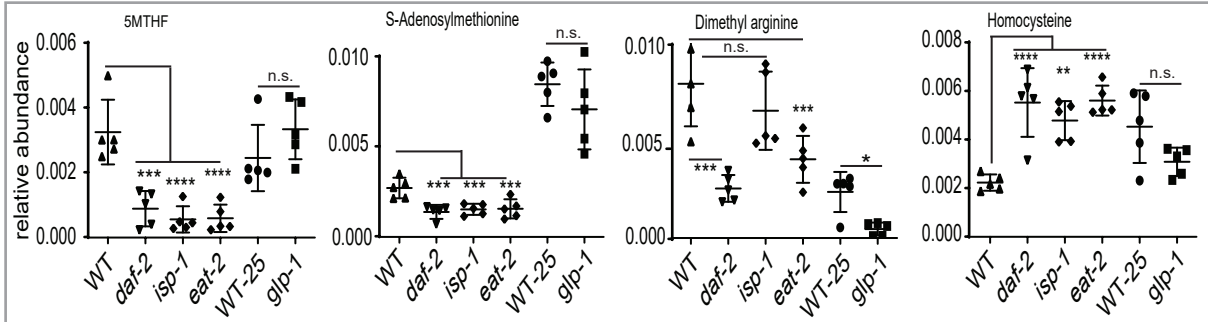

### Nucleotides/ Nucleosides

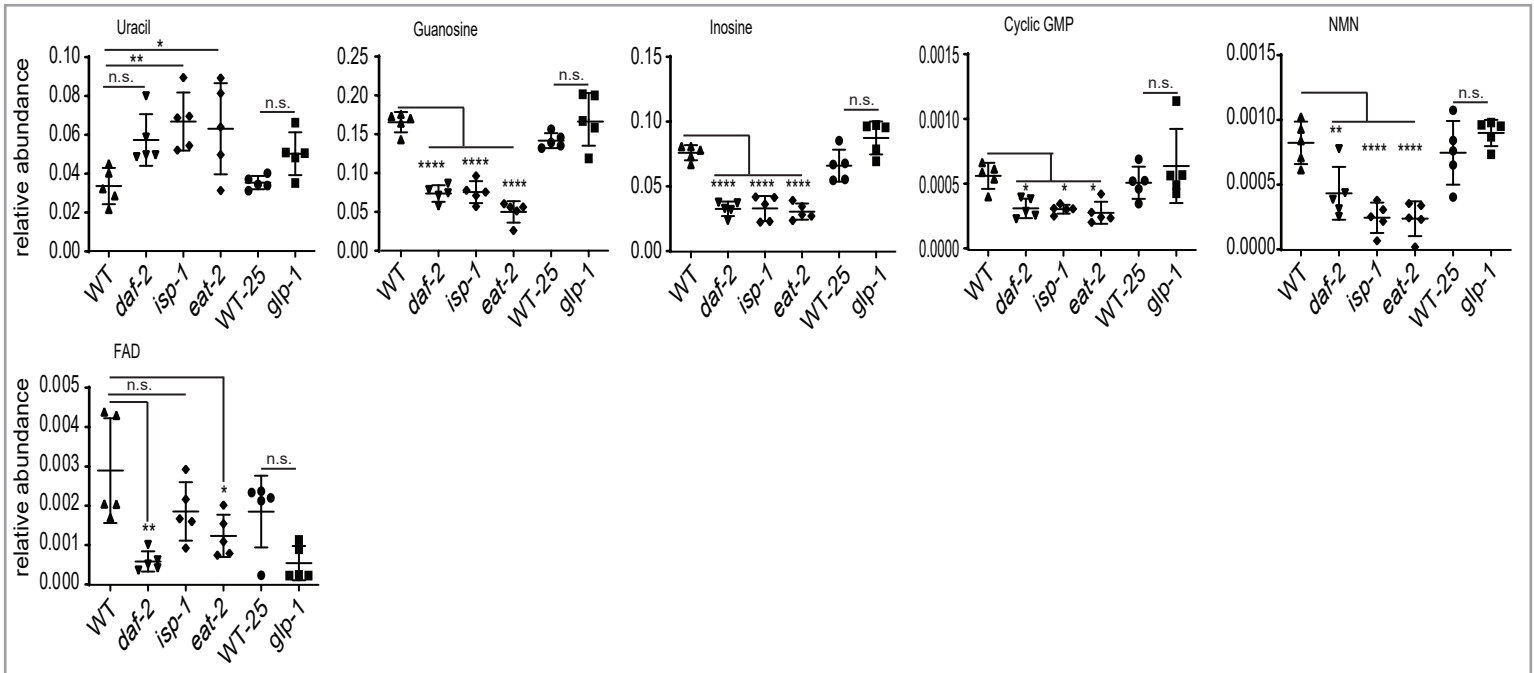

### Miscellaneous

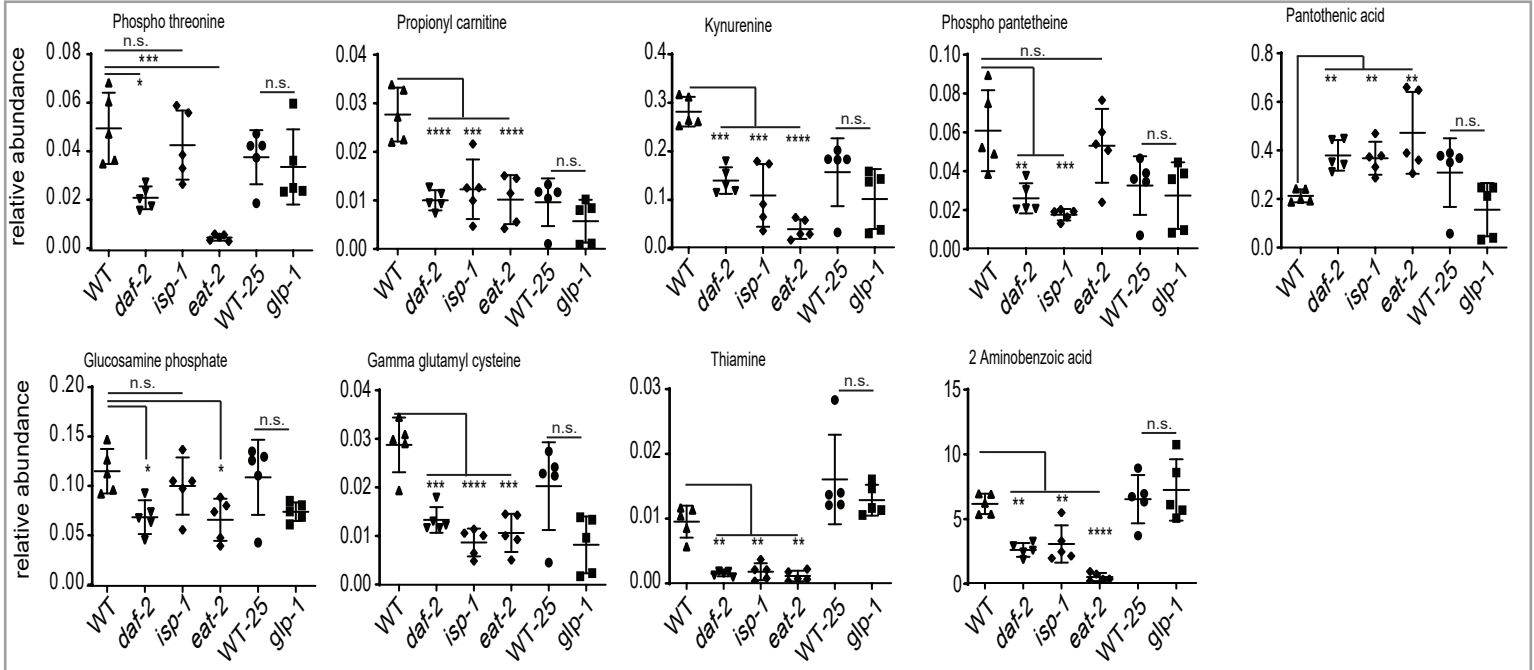

### Supplementary Fig 3

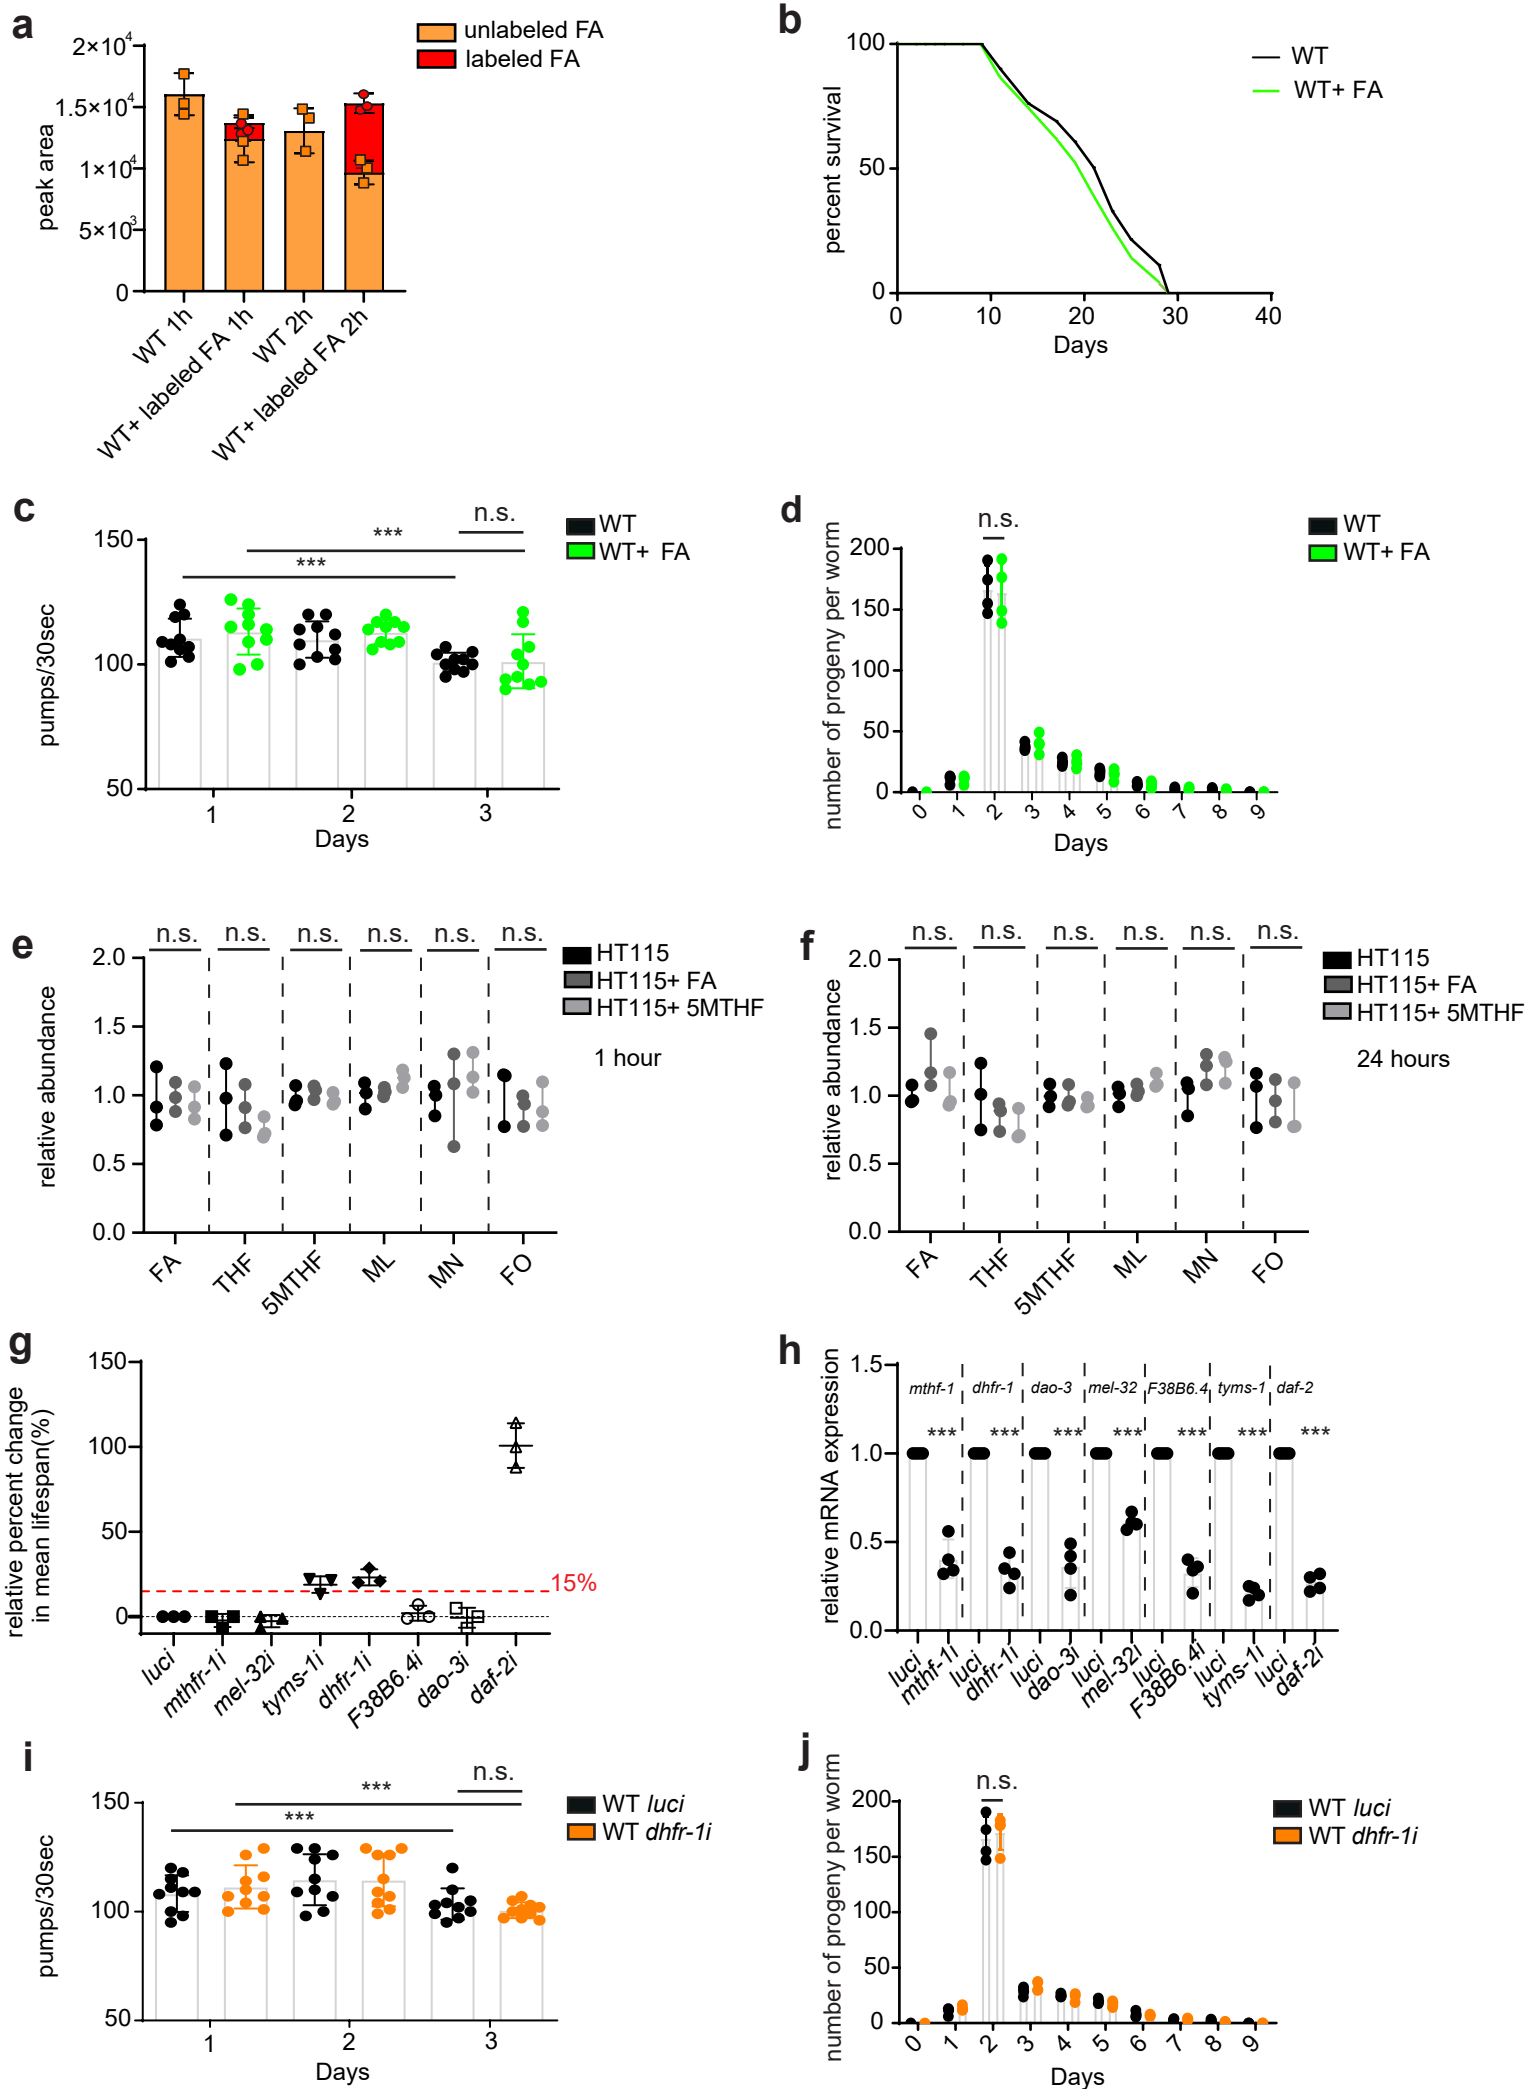

# Supplementary Fig. 4

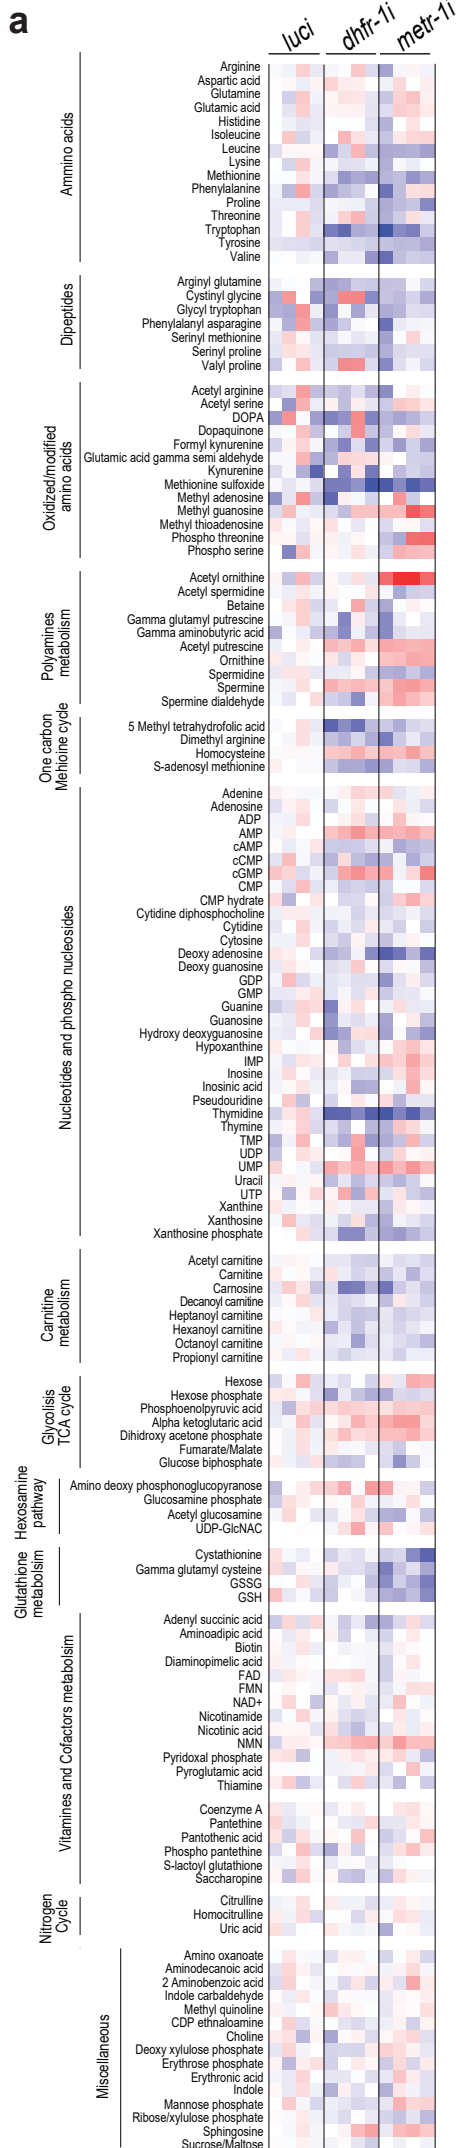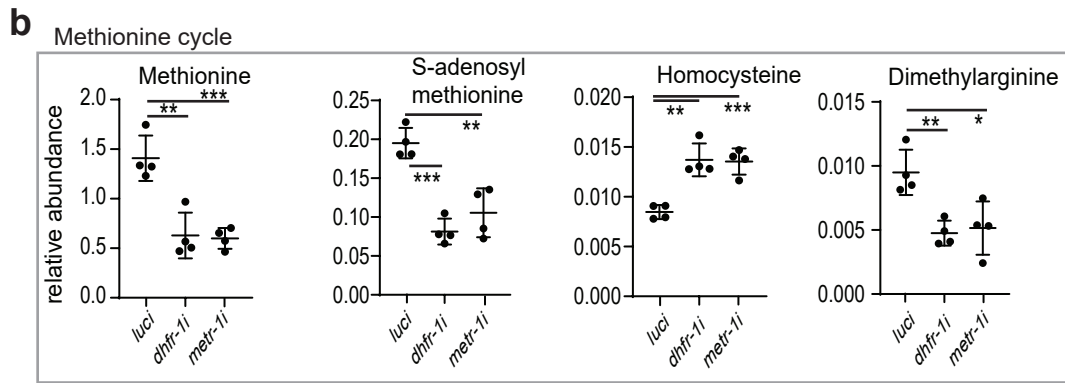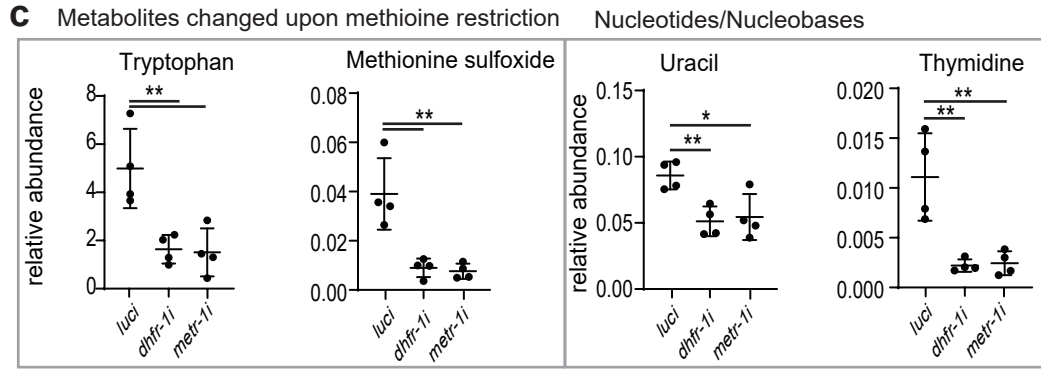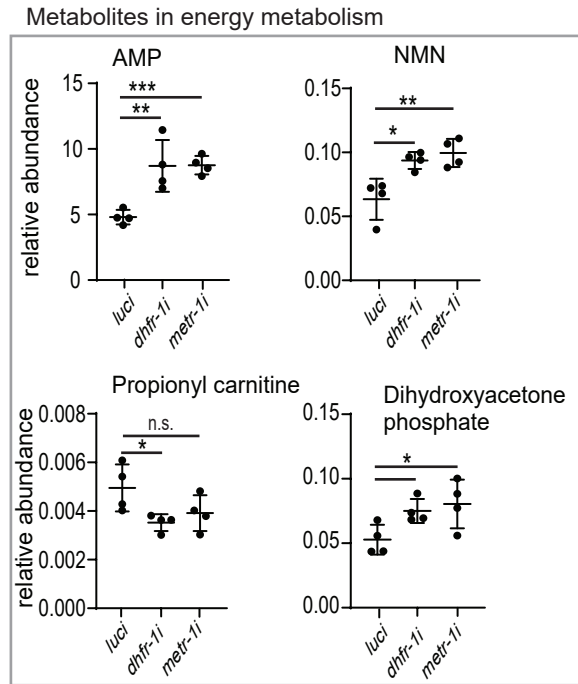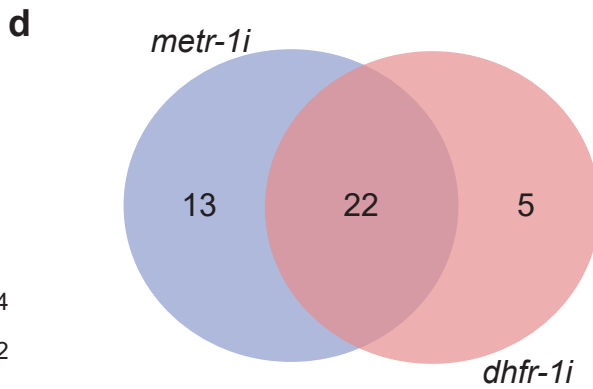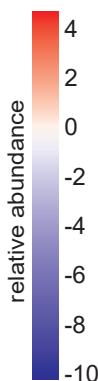



# Supplementary Fig. 4

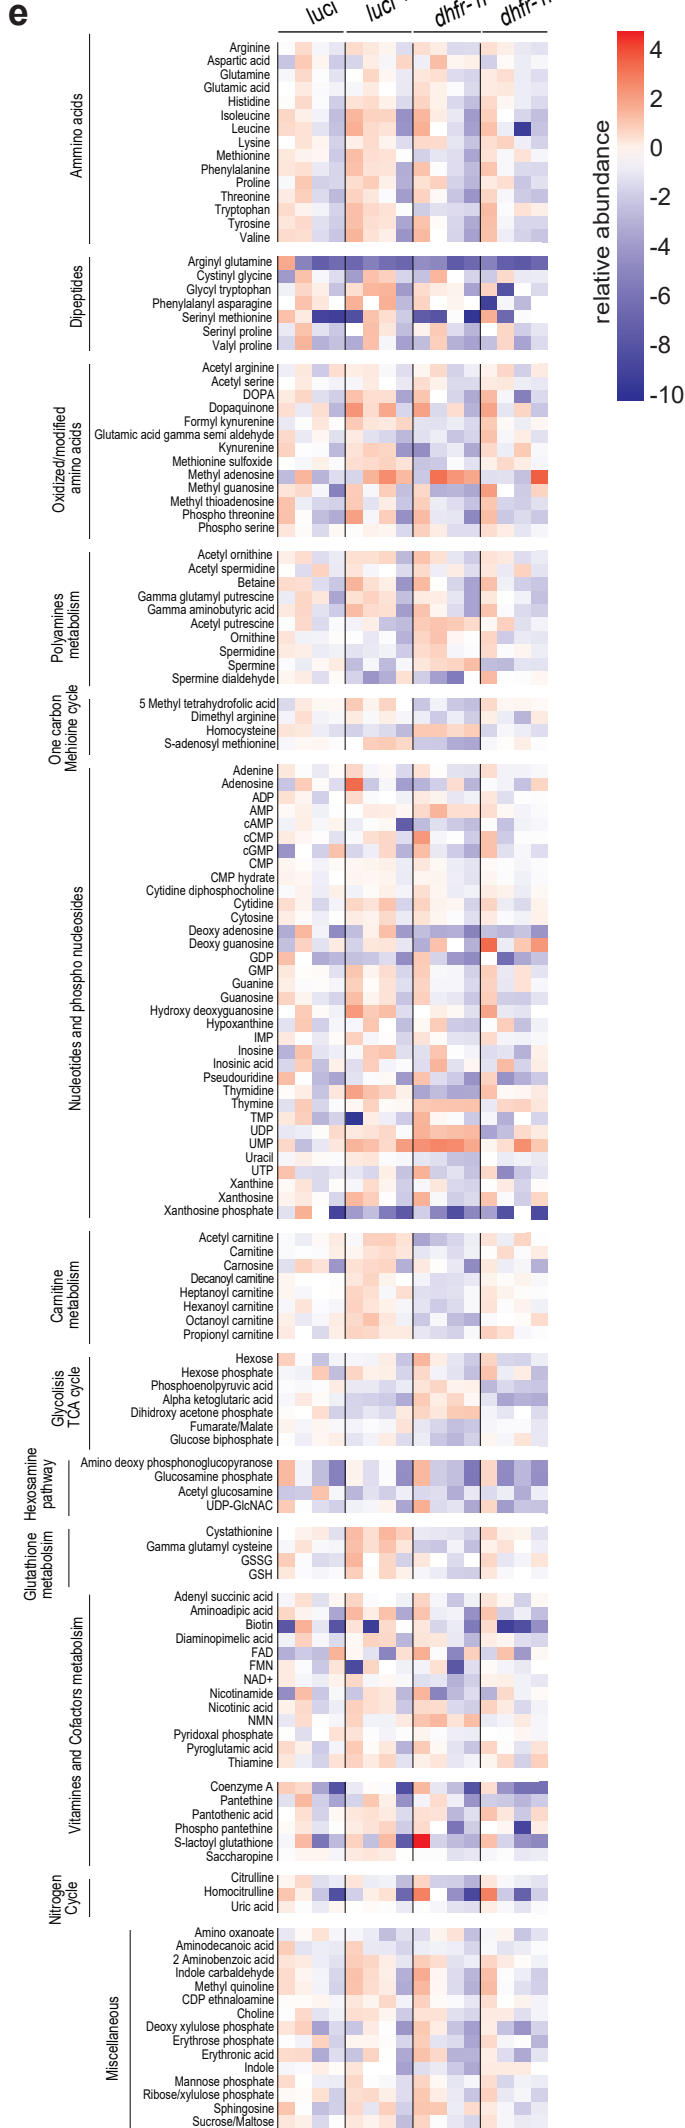

# f Metabolites changed upon methionine restriction

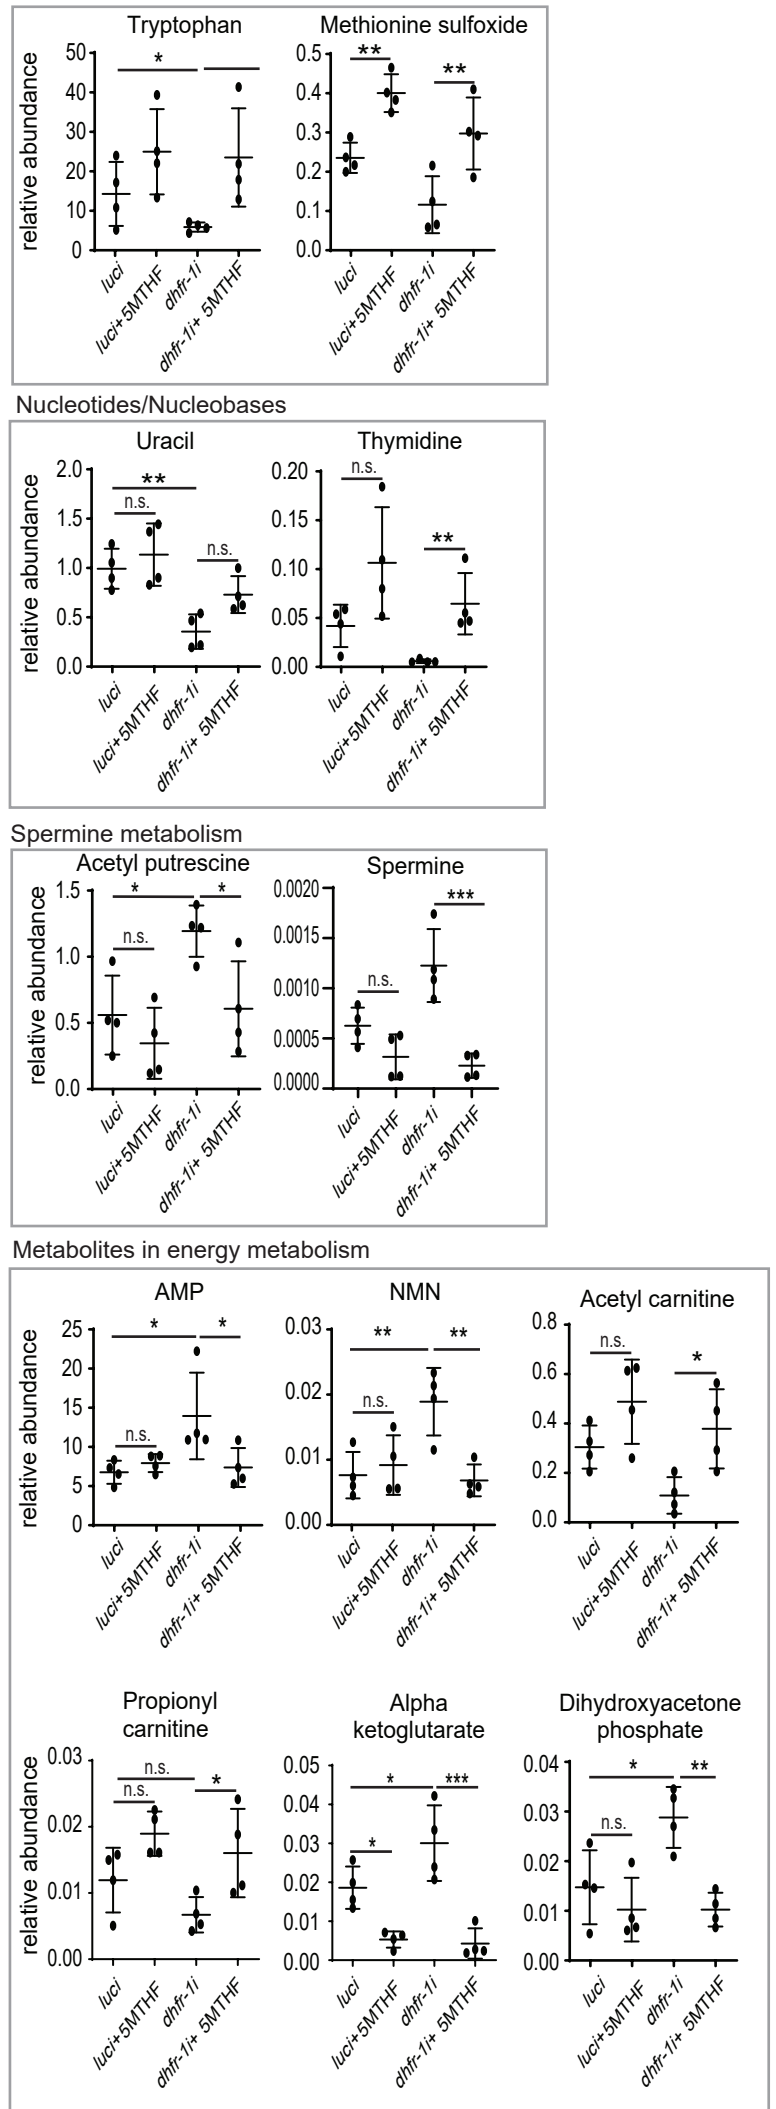

# Supplementary Fig 5

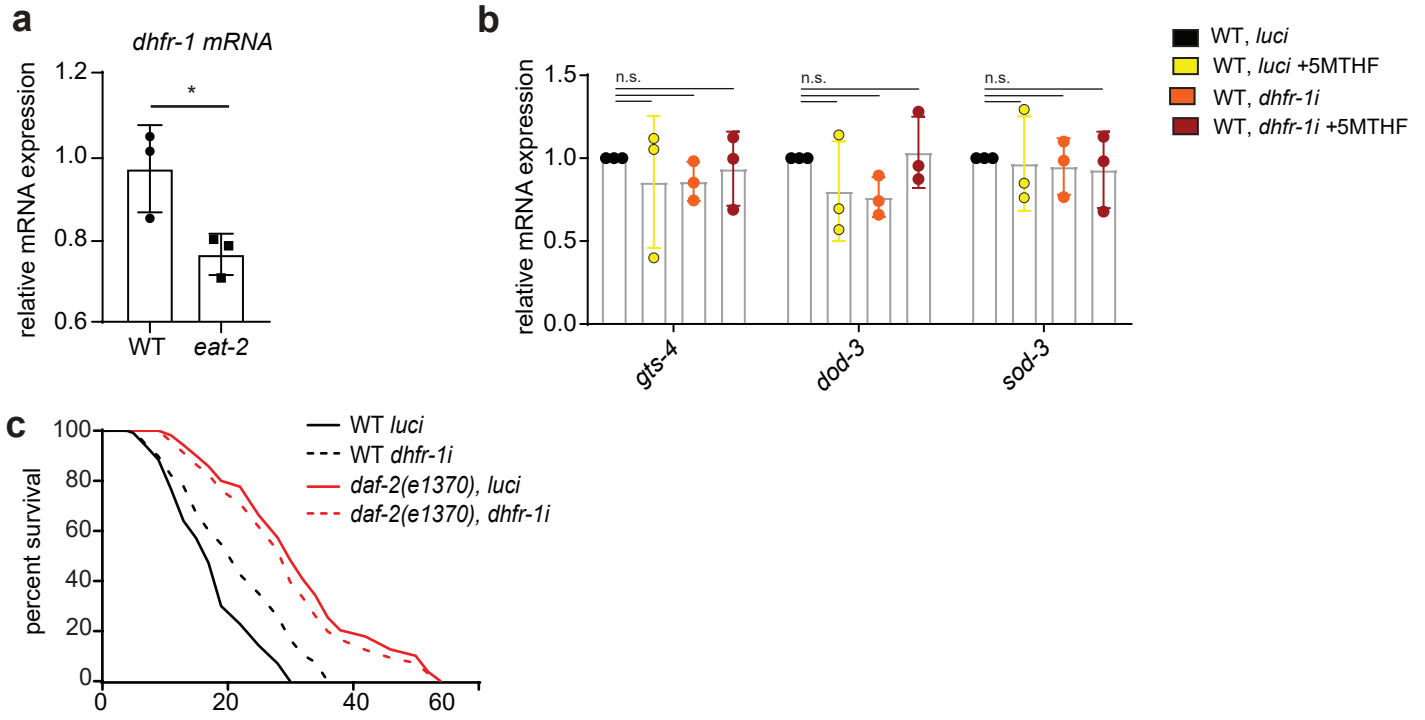

**Supplementary Figure 1: Untargeted metabolomics and pathway analysis of longevity mutants (linked to Fig.1).**

**a**, Mapping of identified metabolites onto KEGG metabolic pathways. Each number refers to a compound listed in Supplementary Data 2. **b**, PLS-DA scores of the untargeted metabolomic features of all five conditions obtained by MetaboAnalyst (<https://www.metaboanalyst.ca>). Component 1, X axis, Component 2, Y axis. In the score plot, the ellipse corresponds to 95% confidence region. **c**, Hierarchical cluster heat maps obtained from MetaboAnalyst using the following parameters: Distance measure, Euclidian, Cluster algorithm Ward. Normalized data were converted into log<sub>2</sub> scale. **d-g**, Enrichment analysis of significant metabolites (adj  $p < 0.05$ ) obtained by uploading differentially regulated metabolites to MetaboAnalyst (<https://www.metaboanalyst.ca>) in the various mutants compared to WT. KEGG pathways containing 84 metabolite sets (KEGG, Oct. 2019) was selected. Detailed parameters are shown in Supplementary Table 3.

**Supplementary Figure 2: Differentially regulated metabolites in the longevity mutants (linked to Fig. 1).**

Significant metabolites (adj  $p < 0.05$ ) for *daf-2*, *isp-1* and *eat-2* genotypes are selected from the untargeted metabolomics analysis (Fig.1a, Supplementary Data 1) and plotted. *glp-1* and WT-25°C are shown for reference. Significance was assessed using one-way anova Dunnett's multiple comparisons test \*  $p < 0.05$ , \*\*  $p < 0.01$ , \*\*\* $p < 0.001$ . Data are presented as mean  $\pm$  S.D.

**Supplementary Figure 3: Effect of folic acid supplementation and folic acid cycle gene knockdown on worm physiology and lifespan (linked to Fig. 2,3,4).**

**a**, Incorporation of <sup>13</sup>C<sup>15</sup>N labeled folic acid in WT worms measured by targeted metabolomics. At 1 and 2 hours, the concentration of labeled FA increases without affecting the overall folic acid concentration pool.

**b**, Supplementation of 10nM folic acid does not affect WT lifespan (from L4 stage) **c**, pharyngeal pumping over 30 second period (day 1 adult) and **d**, brood size of self-fertilizing hermaphrodites during adulthood. **e,f**, Targeted metabolomic analysis of folic acid cycle intermediates in HT115 bacteria upon folic acid and 5MTHF supplementation for 1 hour (**e**) or 24 hr (**f**) show no significant difference in steady state levels of these intermediates.

**g**, Mini-RNAi screen for life span of genes involved in the folic acid cycle (from L4 stage). *dhfr-1i* and *tyms-1i* showed an increase in mean lifespan >15%. **h**, RNAi knockdown efficiency of folate cycle genes (day 1 adult). **i**, Pharyngeal pumping measurement over 30 seconds in *luci* control and *dhfr-1i* treated worms (day 1). **j**, Brood size of *luci* control and *dhfr-1i* treated worms. Self-fertilizing brood size was measured during adulthood.

**a**, N=3 independent biological replicates, each dot represent a single replicate. **b**, n=150 worms per repeat per conditions, N=3 independent biological replicates. **c,i**, n=15 worms, N=3 independent biological replicates. Each dot represent a single worm. **d,j**, n=10 worms, N=4 independent biological replicates. Each dot represent the average of eggs from 10 worms. **e-h**, N=3 independent biological replicates.

**b,g** Statistics were analyzed by two-sided Mantel–Cox log-rank test (Supplementary Table 7 for statistics). **c,e,f,i**, Significance was assessed using one-way anova Dunnett's

multiple comparisons test \*  $p < 0.5$ , \*\*  $p < 0.01$ , \*\*\* $p < 0.001$ . **d,h,j** Significance was assessed using two-sided t-test. Bar shows mean  $\pm$  S.D, \*  $p < 0.5$ , \*\*  $p < 0.01$ , \*\*\* $p < 0.001$ .

**Supplementary Figure 4. Untargeted metabolomic analysis comparing *dhfr-1i* and *metr-1i*, and *dhfr-1i* with or without 5MTHF supplementation (linked to Fig 2,3).**

**a**, Heat map depicting untargeted metabolomic analysis of *luci*, *dhfr-1i* and *metr-1i*, (day 1 of adult) manually grouped in different categories. Metabolite concentrations are listed in Supplementary Data 2.

**b**, Significantly changed metabolites ( $p < .05$ ) from the methionine cycle are selected from the untargeted metabolomics analysis and plotted.

**c**, Significantly changed metabolites ( $p < .05$ ) associated with methionine restriction.

**d**, Venn diagram showing the unique and shared significant metabolites ( $p < .05$ ) between *metr-1i* and *dhfr-1i*.

The unique metabolites for *dhfr-1i* ( $p < .05$ ) are serinyl proline, hexanoyl carnitine, 5MTHF, octanoyl carnitine, propionyl carnitine. The unique metabolites of *metr-1i* ( $p < .05$ ) are spermidine, ribose/xylulose phosphate, alpha ketoglutarate, arginyl glutamine, valine, ornithine, cystathionine, GSH, gamma glutamyl cysteine, IMP, GSSG, acetyl ornithine, cytidine diphosphocholine. The twenty-two metabolites in common ( $p < .05$ ) are thymidine, AMP, uracil, hexose phosphate, spermine, heptanoyl carnitine, cAMP, spermine dialdehyde, acetyl carnitine, deoxy adenosine, homocysteine, dimethyl arginine, UMP, S-adenosylmethionine, tryptophan, methionine sulfoxide, xanthosine phosphate, acetyl putrescine, NMN, dihydroxyacetone phosphate, methionine, formyl kynurenine.

**e**, Heat map of targeted metabolomic analysis of *luci* control and *dhfr-1i* with and without 10nM 5MTHF supplementation (day 1 of adult), manually grouped in different categories. Metabolite concentrations are listed in Supplementary Data 2. **f**, Significant metabolites ( $p < .05$ ) associated with methionine restriction are selected from the untargeted metabolomics analysis and plotted.

**a,e**, N=4 independent biological replicates. **a,e** Normalized metabolites concentrations are converted to log2 for heat map generation **a,e**, Statistics were determined using the one-sided Fisher test and Benjamini-Hochberg correction ( $p < .05$ ) for multiple comparison **b,c,f** Significance was assessed using one-way anova Dunnett's multiple comparisons test. \*  $p < 0.5$ , \*\*  $p < 0.01$ , \*\*\* $p < 0.001$ . Data are presented as mean  $\pm$  S.D.

**Supplementary Figure 5. Regulation of methionine restriction and folate cycle associated genes.**

**a**, *dhfr-1* mRNA expression is downregulated in *eat-2* relative to wild type based on RNA-seq data from Heestand 2013 (day 1 adult). **b**, *daf-16* dependent target gene expression in wild type worms with *luci* or *dhfr-1i* in the presence or absence of 5MTHF (day 1 adult). No significant (n.s.) difference was found between the conditions. **c**, *dhfr-1i* (from L4 stage) does not affect *daf-2(e1370)* lifespan.

**a,b**, N=3 independent biological replicates. **c**, n=150 worms per repeat per conditions, N=2 independent biological replicates. **a,b**, Significance was assessed using two-sided t-test. Bar shows mean  $\pm$  S.D, \*  $p < 0.5$ , \*\*  $p < 0.01$ , \*\*\* $p < 0.001$ . **c**, Statistics were analyzed by two-sided Mantel–Cox log-rank test (Supplementary Table 7 for statistics).

## **Supplemental Table Summary**

**Supplemental Table 1:** List of compounds mapped to KEGG metabolic pathways (Linked to Extended Data Fig 1a).

**Supplemental Table 2:** Comparison of metabolomics analysis with previous published works.

**Supplemental Table 3:** Enrichment analysis of metabolites in longevity mutants (linked to Extended Data Fig 1d,e,f,g).

**Supplemental Table 4:** Features submitted to PIUMet (linked to Fig. 1c).

**Supplemental Table 5:** PIUMet output and input (linked to Fig. 1c).

**Supplemental Table 6:** Targeted metabolomic analysis of folates and methionine.

**Supplemental Table 7:** Lifespan Analyses.

**Supplemental Table 8:** List of gene activation upon methionine restriction validated by qRT-PCR according to Tang *et al* (linked to Figure 3d, Figure 5b).

**Supplemental Table 9:** Strains used in this study.

**Supplemental Table 10:** qRT-PCR primers

**Supplemental Table 1:** List of compounds mapped to KEGG metabolic pathways (Linked to Extended Data Fig 1a).

| Number | KEGG identifier | Compound name             |
|--------|-----------------|---------------------------|
| 1      | C00003          | NAD+                      |
| 2      | C00008          | ADP                       |
| 3      | C00010          | CoA                       |
| 4      | C00015          | UDP                       |
| 5      | C00018          | Pyridoxal phosphate       |
| 6      | C00019          | S-adenosyl methionine     |
| 7      | C00020          | AMP                       |
| 8      | C00025          | Glutamate                 |
| 9      | C00026          | Malate                    |
| 11     | C00031          | Glucose                   |
| 12     | C00035          | GDP                       |
| 13     | C00043          | UDP-GlcNAC                |
| 14     | C00047          | Lysine                    |
| 15     | C00049          | Aspartic acid             |
| 16     | C00051          | GSH                       |
| 17     | C00055          | CMP                       |
| 18     | C00061          | FMN                       |
| 19     | C00062          | Arginine                  |
| 20     | C00064          | Glutamine                 |
| 21     | C00073          | Methionine                |
| 22     | C00074          | Phosphoenolpyruvic acid   |
| 23     | C00077          | Ornithine                 |
| 24     | C00078          | Tryptophan                |
| 25     | C00079          | Phenylalanine             |
| 26     | C00082          | Tyrosine                  |
| 27     | C00103          | Glucose phosphate         |
| 28     | C00105          | UMP                       |
| 29     | C00106          | Uracil                    |
| 31     | C00111          | Glycerol phosphate        |
| 32     | C00114          | Choline                   |
| 33     | C00117          | Ribose/xylulose phosphate |
| 34     | C00120          | Biotin                    |
| 35     | C00122          | Fumarate                  |
| 36     | C00123          | Leucine                   |
| 37     | C00127          | GSSG                      |
| 38     | C00130          | IMP                       |

|    |        |                         |
|----|--------|-------------------------|
| 39 | C00140 | Acetyl glucosamine      |
| 40 | C00144 | GMP                     |
| 41 | C00147 | Adenine                 |
| 42 | C00148 | Proline                 |
| 43 | C00153 | NMN                     |
| 44 | C00155 | Homocysteine            |
| 46 | C00170 | Methyl thio adenosine   |
| 47 | C00183 | Valine                  |
| 48 | C00188 | Threonine               |
| 49 | C00212 | Adenosine               |
| 50 | C00214 | Thymidine               |
| 52 | C00242 | Guanine                 |
| 53 | C00253 | Nicotinic acid          |
| 54 | C00262 | Hypoxanthine            |
| 55 | C00279 | Erythronic acid         |
| 56 | C00294 | Inosine                 |
| 57 | C00299 | Uridine                 |
| 59 | C00315 | Spermidine              |
| 61 | C00327 | Citrulline              |
| 62 | C00330 | Deoxy guanosine         |
| 64 | C00334 | Amino oxonoate          |
| 65 | C00352 | Glucosamine phosphate   |
| 67 | C00366 | Uric acid               |
| 68 | C00380 | Cytosine                |
| 69 | C00385 | Xanthine                |
| 70 | C00386 | Carnosine               |
| 71 | C00387 | Guanosine               |
| 72 | C00407 | Isoleucine              |
| 73 | C00437 | Acetyl ornithine        |
| 74 | C00475 | Cytidine                |
| 75 | C00489 | glutaric acid           |
| 76 | C00559 | Deoxy adenosine         |
| 77 | C00570 | CDP ethanolamine        |
| 78 | C00636 | Mannose phosphate       |
| 79 | C00655 | Xanthosine 5 P          |
| 80 | C00669 | Gamma glutamyl cysteine |
| 81 | C00719 | Betaine                 |
| 82 | C00750 | Spermine                |
| 83 | C00822 | Dopaquinone             |
| 84 | C00864 | Pantothenic acid        |
| 85 | C00956 | Aminoadipic acid        |

|     |        |                           |
|-----|--------|---------------------------|
| 86  | C00979 | Acetyl serine             |
| 88  | C01134 | Pantethine phosphate      |
| 89  | C01165 | Glutamate semialdehyde    |
| 90  | C01185 | Nicotinamide              |
| 91  | C01231 | Glucose bisphosphate      |
| 92  | C01762 | Xanthosine                |
| 95  | C02067 | Pseudouridine             |
| 96  | C02291 | Cytidine diphosphocholine |
| 97  | C02353 | cAMP                      |
| 101 | C02700 | Formyl kynurenine         |
| 102 | C02714 | Acetyl putrescine         |
| 103 | C02989 | Methionine oxide          |
| 106 | C03508 | Amino butanoate           |
| 111 | C06194 | cGMP                      |
| 113 | C11437 | Deoxy xylulose phosphate  |
| 115 | C15699 | Gamma glutamyl putrescine |



**Supplemental Table 2:** Comparison of metabolomics analysis with previous published works.

- 1** Wan QL, Shi X, Liu J, Ding AJ, Pu YZ, Li Z, Wu GS, Luo HR. Metabolomic signature associated with reproduction-regulated aging in *Caenorhabditis elegans*. *Aging (Albany NY)*. 2017 Feb 6;9(2):447-474. doi: 10.18632/aging.101170. PMID: 28177875; PMCID: PMC5361674.
- 2** Fuchs S, Bundy JG, Davies SK, Viney JM, Swire JS, Leroi AM. A metabolic signature of long life in *Caenorhabditis elegans*. *BMC Biol*. 2010 Feb 10;8:14. doi: 10.1186/1741-7007-8-14. PMID: 20146810; PMCID: PMC2829508.
- 3** Pontoizeau C, Mouchiroud L, Molin L, Mergoud-Dit-Lamarche A, Dalli re N, Toulhoat P, Elena-Herrmann B, Solari F. Metabolomics analysis uncovers that dietary restriction buffers metabolic changes associated with aging in *Caenorhabditis elegans*. *J Proteome Res*. 2014 Jun 6;13(6):2910-9. doi: 10.1021/pr5000686. Epub 2014 May 22. PMID: 24819046; PMCID: PMC4059273.
- 4** Butler JA, Mishur RJ, Bhaskaran S, Rea SL. A metabolic signature for long life in the *Caenorhabditis elegans* Mit mutants. *Aging Cell*. 2013 Feb;12(1):130-8. doi: 10.1111/accel.12029. PMID: 23173729; PMCID: PMC3552119.
- 5** Gao AW, Smith RL, van Weeghel M, Kamble R, Janssens GE, Houtkooper RH. Identification of key pathways and metabolic fingerprints of longevity in *C. elegans*. *Exp Gerontol*. 2018 Nov;113:128-140. doi: 10.1016/j.exger.2018.10.003. Epub 2018 Oct 6. PMID: 30300667; PMCID: PMC6224709.
- 6** Hastings J, Mains A, Virk B, Rodriguez N, Murdoch S, Pearce J, Bergmann S, Le Nov re N, Casanueva O. Multi-Omics and Genome-Scale Modeling Reveal a Metabolic Shift During *C. elegans* Aging. *Front Mol Biosci*. 2019 Feb 6;6:2. doi: 10.3389/fmolb.2019.00002. PMID: 30788345; PMCID: PMC6372924.

Red upregulated, blue down regulated, only significant metabolites are compared.

We indicate the term AGREE when a metabolite from our work changes in the same direction from published works. We indicate the term DISAGREE when a metabolite from our work did not change or changed in the opposite direction from published works.

| compounds name                     | This study |          |          |             | 1        | 2        | 3        | 4        | 5                 | 6        |
|------------------------------------|------------|----------|----------|-------------|----------|----------|----------|----------|-------------------|----------|
|                                    | daf-2/WT   | eat-2/WT | isp-1/WT | glp-1/WT 25 | glp-1/WT | daf-2/WT | eat-2/WT | isp-1/WT | daf-2/WT eat-2/WT | WT aging |
| 2 Aminobenzoic acid                |            |          |          |             |          |          |          |          |                   |          |
| 5 Methyl tetrahydrofolate          |            |          |          |             |          |          |          |          |                   |          |
| Acetyl arginine                    |            |          |          |             |          |          |          |          |                   |          |
| Acetyl carnitine                   |            |          |          |             |          |          |          |          |                   | DISAGREE |
| Acetyl glucosamine                 |            |          |          |             |          |          |          |          |                   |          |
| Acetyl glucosamine                 |            |          |          |             |          |          |          |          |                   |          |
| Acetyl ornithine                   |            |          |          |             |          |          |          |          |                   |          |
| Acetyl serine                      |            |          |          |             |          |          |          |          |                   |          |
| Acetyl spermidine                  |            |          |          |             |          |          |          |          |                   |          |
| Acetyl putrescine                  |            |          |          |             |          |          |          |          |                   |          |
| Adenine                            |            |          |          |             | AGREE    |          |          |          | AGREE             |          |
| Adenosine                          |            |          |          |             | AGREE    |          |          |          |                   |          |
| Adenylysuccinic acid               |            |          |          |             |          |          |          |          |                   |          |
| ADP                                |            |          |          |             |          |          |          |          |                   |          |
| Alpha ketoglutarate                |            |          |          |             |          |          |          |          |                   |          |
| Amino adipic acid                  |            |          |          |             |          |          |          |          |                   | DISAGREE |
| Amino decanoic acid                |            |          |          |             |          |          |          |          |                   |          |
| Amino deoxyphosphono glucopyranose |            |          |          |             |          |          |          |          |                   |          |
| Amino oxonoate                     |            |          |          |             |          |          |          |          |                   |          |
| AMP                                |            |          |          |             | AGREE    |          |          |          | AGREE             |          |
| Arginine                           |            |          |          |             | AGREE    | DISAGREE | AGREE    | AGREE    |                   | AGREE    |
| Arginyl glutamine                  |            |          |          |             |          |          |          |          |                   |          |
| Aspartic acid                      |            |          |          |             |          | DISAGREE |          |          | AGREE             |          |
| Betaine                            |            |          |          |             |          | DISAGREE |          |          |                   | AGREE    |
| Biotin                             |            |          |          |             | DISAGREE |          |          |          |                   |          |
| cAMP                               |            |          |          |             |          |          |          |          |                   |          |
| Carnitine                          |            |          |          |             | AGREE    |          |          |          |                   | DISAGREE |



|                                  |      |      |      |      |
|----------------------------------|------|------|------|------|
| Fumarate/Malate                  |      |      | Blue | Blue |
| Gamma amino butyric acid         |      | Red  | Blue |      |
| Gamma glutamyl cysteine          | Red  | Red  | Red  |      |
| Gamma glutamyl putrescine        |      | Red  |      |      |
| GDP                              | Red  |      |      |      |
| Glucosamine phosphate            | Red  | Red  |      |      |
| Glucose bisphosphate             |      |      | Blue |      |
| Glutamic acid                    | Blue | Blue |      | Red  |
| Glutamic acid gamma semialdehyde |      |      |      |      |
| Glutamine                        |      | Blue |      |      |
| Glycyl tryptophan                |      |      |      |      |
| GMP                              | Red  | Red  |      |      |
| GSH                              |      |      | Red  | Red  |
| GSSG                             |      |      |      | Red  |
| Guanine                          | Blue |      |      |      |
| Guanosine                        | Red  | Red  | Red  |      |
| Heptanoyl carnitine              |      |      |      |      |
| Hexanoyl carnitine               | Red  |      |      | Blue |
| Hexose                           |      | Red  |      |      |
| Hexose phosphate                 | Blue | Red  | Blue |      |
| Histidine                        |      |      |      | Blue |
| Homocitrulline                   |      |      | Red  |      |
| Homocysteine                     | Blue | Blue | Blue |      |
| Hydroxy deoxy guanosine          |      |      |      |      |
| Hypoxanthine                     | Red  |      | Blue |      |
| IMP                              | Blue |      |      |      |
| Indole                           |      |      |      | Blue |

|          |          |          |          |          |          |
|----------|----------|----------|----------|----------|----------|
|          | DISAGREE |          | AGREE    |          |          |
|          |          |          |          |          |          |
|          |          |          |          |          |          |
|          |          |          |          |          |          |
|          |          |          |          |          |          |
|          |          |          |          |          |          |
| AGREE    | DISAGREE | DISAGREE | AGREE    |          | AGREE    |
|          |          |          |          |          |          |
| DISAGREE |          | AGREE    | AGREE    | AGREE    |          |
|          |          |          |          |          | DISAGREE |
| AGREE    |          |          |          |          |          |
|          |          |          |          |          |          |
|          |          |          |          |          | DISAGREE |
|          |          |          |          |          |          |
| DISAGREE |          |          |          | DISAGREE |          |
| AGREE    |          |          |          |          |          |
|          |          |          |          |          |          |
|          |          |          |          |          |          |
|          |          |          |          |          |          |
| DISAGREE |          |          |          |          |          |
| AGREE    |          |          |          |          |          |
|          |          |          |          |          |          |
|          |          |          |          |          |          |
|          |          |          | DISAGREE |          |          |
| DISAGREE |          |          |          |          |          |
|          |          |          |          |          |          |

|                         |  |  |  |  |
|-------------------------|--|--|--|--|
| Indole carbaldehyde     |  |  |  |  |
| Inosine                 |  |  |  |  |
| Inosinic acid           |  |  |  |  |
| Isoleucine              |  |  |  |  |
| Kynurenine              |  |  |  |  |
| Leucine                 |  |  |  |  |
| Lysine                  |  |  |  |  |
| Mannose phosphate       |  |  |  |  |
| Methionine              |  |  |  |  |
| Methionine sulfoxide    |  |  |  |  |
| Methyl adenosine        |  |  |  |  |
| Methyl guanosine        |  |  |  |  |
| Methyl quinoline        |  |  |  |  |
| Methyl thioadenosine    |  |  |  |  |
| NAD+                    |  |  |  |  |
| Nicotinamide            |  |  |  |  |
| Nicotinic acid          |  |  |  |  |
| NMN                     |  |  |  |  |
| Octanoyl carnitine      |  |  |  |  |
| Ornithine               |  |  |  |  |
| Pantethine              |  |  |  |  |
| Pantothenic acid        |  |  |  |  |
| Phenylalanine           |  |  |  |  |
| Phenylalanyl asparagine |  |  |  |  |
| Phospho serine          |  |  |  |  |
| Phosphoenolpyruvic acid |  |  |  |  |
| Phospho threonine       |  |  |  |  |
| Phospho pantethine      |  |  |  |  |
| Proline                 |  |  |  |  |

|       |          |          |       |          |          |
|-------|----------|----------|-------|----------|----------|
|       |          |          |       |          |          |
|       |          |          |       |          |          |
| AGREE | AGREE    | DISAGREE | AGREE | AGREE    |          |
|       |          |          |       |          |          |
|       | AGREE    | AGREE    |       | AGREE    | AGREE    |
|       | AGREE    | AGREE    | AGREE |          | AGREE    |
|       |          |          |       |          |          |
|       |          |          | AGREE | DISAGREE | DISAGREE |
|       |          |          |       |          |          |
|       |          |          |       |          |          |
|       |          |          |       |          |          |
|       |          |          |       |          |          |
|       |          |          |       | DISAGREE |          |
|       |          |          |       |          |          |
|       | DISAGREE |          |       |          |          |
|       |          |          |       |          |          |
|       |          |          |       |          |          |
|       |          |          |       |          |          |
|       |          |          |       |          | AGREE    |
|       |          |          |       |          |          |
|       |          |          |       |          |          |
|       |          |          |       |          |          |
|       |          |          |       |          |          |
|       |          |          |       |          |          |
|       |          |          |       |          |          |
|       | DISAGREE | AGREE    | AGREE | AGREE    |          |

|                           |  |  |  |  |
|---------------------------|--|--|--|--|
| Propionyl carnitine       |  |  |  |  |
| Pseudouridine             |  |  |  |  |
| Pyridoxal phosphate       |  |  |  |  |
| Pyroglutamic acid         |  |  |  |  |
| Ribose/xylulose phosphate |  |  |  |  |
| Saccharopine              |  |  |  |  |
| S-adenosylmethionine      |  |  |  |  |
| Seriny methionine         |  |  |  |  |
| Seriny proline            |  |  |  |  |
| S-lactoylglutathione      |  |  |  |  |
| Spermidine                |  |  |  |  |
| Spermine                  |  |  |  |  |
| Spermine dialdehyde       |  |  |  |  |
| Sphingosine               |  |  |  |  |
| Sucrose/Maltose           |  |  |  |  |
| Thiamine                  |  |  |  |  |
| Threonine                 |  |  |  |  |
| Thymidine                 |  |  |  |  |
| Thymine                   |  |  |  |  |
| TMP                       |  |  |  |  |
| Tryptophan                |  |  |  |  |
| Tyrosine                  |  |  |  |  |
| UDP                       |  |  |  |  |
| UDP-GlcNAC                |  |  |  |  |
| UMP                       |  |  |  |  |
| Uracil                    |  |  |  |  |
| Uric acid                 |  |  |  |  |
| Uridine triphosphate      |  |  |  |  |
| Valine                    |  |  |  |  |

|          |       |       |          |          |          |
|----------|-------|-------|----------|----------|----------|
|          |       |       |          |          |          |
|          |       |       |          |          |          |
|          |       |       |          |          |          |
|          |       |       |          |          |          |
|          |       |       |          |          |          |
|          |       |       |          |          |          |
| DISAGREE |       |       |          |          |          |
|          |       |       |          |          |          |
|          |       |       |          |          |          |
|          |       |       |          |          |          |
|          |       |       |          |          |          |
|          |       |       |          |          |          |
|          |       |       |          |          |          |
|          |       |       |          |          |          |
|          |       |       | AGREE    | DISAGREE | DISAGREE |
| DISAGREE |       |       |          |          |          |
|          |       |       |          |          |          |
|          |       |       |          |          |          |
|          |       |       |          |          |          |
|          |       |       |          |          |          |
|          |       |       |          |          |          |
|          |       |       |          |          |          |
|          |       |       |          |          |          |
|          |       |       |          |          |          |
|          | AGREE |       |          |          | DISAGREE |
| AGREE    | AGREE | AGREE | AGREE    |          |          |
|          |       |       |          |          |          |
|          |       |       |          |          |          |
|          |       |       |          | DISAGREE |          |
|          |       |       | DISAGREE |          | DISAGREE |
|          |       |       |          |          |          |
|          |       |       |          |          |          |
|          | AGREE | AGREE | DISAGREE |          |          |



**Supplemental Table 3:** Enrichment analysis of metabolites in longevity mutants (linked to Extended Data Fig 1d,e,f,g).

| <i>glp-1</i> vs WT-25                               | total | expect ed | hits | Raw p    | Holm p | FDR    |
|-----------------------------------------------------|-------|-----------|------|----------|--------|--------|
| Aminoacyl-tRNA biosynthesis                         | 48    | 1.48      | 8    | 6.67E-05 | 0.0056 | 0.0056 |
| Purine metabolism                                   | 65    | 2.01      | 7    | 0.00303  | 0.251  | 0.127  |
| Phenylalanine, tyrosine and tryptophan biosynthesis | 4     | 0.124     | 2    | 0.00538  | 0.442  | 0.151  |
| Glutathione metabolism                              | 28    | 0.865     | 4    | 0.00949  | 0.769  | 0.199  |
| D-Glutamine and D-glutamate metabolism              | 6     | 0.185     | 2    | 0.0129   | 1      | 0.217  |
| Valine, leucine and isoleucine biosynthesis         | 8     | 0.247     | 2    | 0.0232   | 1      | 0.278  |
| beta-Alanine metabolism                             | 21    | 0.648     | 3    | 0.0249   | 1      | 0.278  |
| Arginine and proline metabolism                     | 38    | 1.17      | 4    | 0.0273   | 1      | 0.278  |
| Pyrimidine metabolism                               | 39    | 1.2       | 4    | 0.0297   | 1      | 0.278  |
| Phenylalanine metabolism                            | 10    | 0.309     | 2    | 0.0359   | 1      | 0.301  |
| Lysine degradation                                  | 25    | 0.772     | 3    | 0.0394   | 1      | 0.301  |
| Arginine biosynthesis                               | 14    | 0.432     | 2    | 0.0671   | 1      | 0.47   |
| Histidine metabolism                                | 16    | 0.494     | 2    | 0.0851   | 1      | 0.55   |
| Pantothenate and CoA biosynthesis                   | 19    | 0.587     | 2    | 0.114    | 1      | 0.661  |
| Riboflavin metabolism                               | 4     | 0.124     | 1    | 0.118    | 1      | 0.661  |
| Nitrogen metabolism                                 | 6     | 0.185     | 1    | 0.172    | 1      | 0.902  |
| Thiamine metabolism                                 | 7     | 0.216     | 1    | 0.197    | 1      | 0.976  |
| Alanine, aspartate and glutamate metabolism         | 28    | 0.865     | 2    | 0.213    | 1      | 0.995  |
| Ubiquinone and other terpenoid-quinone biosynthesis | 9     | 0.278     | 1    | 0.247    | 1      | 1      |
| Biotin metabolism                                   | 10    | 0.309     | 1    | 0.27     | 1      | 1      |
| Glycine, serine and threonine metabolism            | 33    | 1.02      | 2    | 0.271    | 1      | 1      |
| Glycerophospholipid metabolism                      | 36    | 1.11      | 2    | 0.306    | 1      | 1      |
| Tyrosine metabolism                                 | 42    | 1.3       | 2    | 0.375    | 1      | 1      |
| Butanoate metabolism                                | 15    | 0.463     | 1    | 0.377    | 1      | 1      |
| Porphyrin and chlorophyll metabolism                | 30    | 0.926     | 1    | 0.613    | 1      | 1      |
| Glyoxylate and dicarboxylate metabolism             | 32    | 0.988     | 1    | 0.637    | 1      | 1      |



|                                             |    |      |   |       |   |   |
|---------------------------------------------|----|------|---|-------|---|---|
| Cysteine and methionine metabolism          | 33 | 1.02 | 1 | 0.649 | 1 | 1 |
| Amino sugar and nucleotide sugar metabolism | 37 | 1.14 | 1 | 0.691 | 1 | 1 |
| Fatty acid degradation                      | 39 | 1.2  | 1 | 0.71  | 1 | 1 |
| Valine, leucine and isoleucine degradation  | 40 | 1.24 | 1 | 0.72  | 1 | 1 |

| <i>daf-2</i> vs WT                                  | total | expected | hits | Raw p    | Holm p   | FDR      |
|-----------------------------------------------------|-------|----------|------|----------|----------|----------|
| Aminoacyl-tRNA biosynthesis                         | 48    | 2.02     | 12   | 2.30E-07 | 1.93E-05 | 1.93E-05 |
| Purine metabolism                                   | 65    | 2.73     | 12   | 7.59E-06 | 0.00063  | 0.000319 |
| D-Glutamine and D-glutamate metabolism              | 6     | 0.252    | 4    | 4.01E-05 | 0.00329  | 0.00112  |
| Valine, leucine and isoleucine biosynthesis         | 8     | 0.336    | 4    | 0.000176 | 0.0142   | 0.00369  |
| Pantothenate and CoA biosynthesis                   | 19    | 0.799    | 5    | 0.000828 | 0.0662   | 0.0139   |
| Arginine biosynthesis                               | 14    | 0.589    | 4    | 0.00207  | 0.164    | 0.029    |
| Nicotinate and nicotinamide metabolism              | 15    | 0.631    | 4    | 0.00274  | 0.214    | 0.0329   |
| Arginine and proline metabolism                     | 38    | 1.6      | 6    | 0.00418  | 0.322    | 0.0439   |
| Phenylalanine, tyrosine and tryptophan biosynthesis | 4     | 0.168    | 2    | 0.00989  | 0.752    | 0.0758   |
| Riboflavin metabolism                               | 4     | 0.168    | 2    | 0.00989  | 0.752    | 0.0758   |
| beta-Alanine metabolism                             | 21    | 0.883    | 4    | 0.00993  | 0.752    | 0.0758   |
| Nitrogen metabolism                                 | 6     | 0.252    | 2    | 0.0234   | 1        | 0.164    |
| Alanine, aspartate and glutamate metabolism         | 28    | 1.18     | 4    | 0.0272   | 1        | 0.176    |
| Phenylalanine metabolism                            | 10    | 0.42     | 2    | 0.063    | 1        | 0.378    |
| Pyrimidine metabolism                               | 39    | 1.64     | 4    | 0.0777   | 1        | 0.435    |
| Lysine degradation                                  | 25    | 1.05     | 3    | 0.0844   | 1        | 0.443    |
| Tryptophan metabolism                               | 41    | 1.72     | 4    | 0.0899   | 1        | 0.444    |
| Glutathione metabolism                              | 28    | 1.18     | 3    | 0.11     | 1        | 0.514    |
| Histidine metabolism                                | 16    | 0.673    | 2    | 0.143    | 1        | 0.633    |
| Cysteine and methionine metabolism                  | 33    | 1.39     | 3    | 0.159    | 1        | 0.666    |

|                                                     |    |       |   |       |   |      |
|-----------------------------------------------------|----|-------|---|-------|---|------|
| Valine, leucine and isoleucine degradation          | 40 | 1.68  | 3 | 0.235 | 1 | 0.9  |
| Pyruvate metabolism                                 | 22 | 0.925 | 2 | 0.236 | 1 | 0.9  |
| Thiamine metabolism                                 | 7  | 0.294 | 1 | 0.26  | 1 | 0.95 |
| Ubiquinone and other terpenoid-quinone biosynthesis | 9  | 0.378 | 1 | 0.321 | 1 | 1    |
| One carbon pool by folate                           | 9  | 0.378 | 1 | 0.321 | 1 | 1    |
| Vitamin B6 metabolism                               | 9  | 0.378 | 1 | 0.321 | 1 | 1    |
| Biotin metabolism                                   | 10 | 0.42  | 1 | 0.35  | 1 | 1    |
| Glyoxylate and dicarboxylate metabolism             | 32 | 1.35  | 2 | 0.393 | 1 | 1    |
| Amino sugar and nucleotide sugar metabolism         | 37 | 1.56  | 2 | 0.467 | 1 | 1    |
| Butanoate metabolism                                | 15 | 0.631 | 1 | 0.477 | 1 | 1    |
| Tyrosine metabolism                                 | 42 | 1.77  | 2 | 0.535 | 1 | 1    |
| Citrate cycle (TCA cycle)                           | 20 | 0.841 | 1 | 0.579 | 1 | 1    |
| Glycolysis / Gluconeogenesis                        | 26 | 1.09  | 1 | 0.676 | 1 | 1    |
| Porphyrin and chlorophyll metabolism                | 30 | 1.26  | 1 | 0.728 | 1 | 1    |
| Glycine, serine and threonine metabolism            | 33 | 1.39  | 1 | 0.761 | 1 | 1    |
| Glycerophospholipid metabolism                      | 36 | 1.51  | 1 | 0.791 | 1 | 1    |

| <i>isp-1</i> vs WT                          | total | expected | hits | Raw p    | Holm p   | FDR      |
|---------------------------------------------|-------|----------|------|----------|----------|----------|
| D-Glutamine and D-glutamate metabolism      | 6     | 0.146    | 5    | 3.80E-08 | 3.19E-06 | 3.19E-06 |
| Arginine biosynthesis                       | 14    | 0.34     | 4    | 0.000249 | 0.0207   | 0.0105   |
| Pantothenate and CoA biosynthesis           | 19    | 0.462    | 4    | 0.000884 | 0.0725   | 0.0247   |
| Purine metabolism                           | 65    | 1.58     | 6    | 0.00394  | 0.319    | 0.0618   |
| Alanine, aspartate and glutamate metabolism | 28    | 0.681    | 4    | 0.00399  | 0.319    | 0.0618   |
| Butanoate metabolism                        | 15    | 0.365    | 3    | 0.00492  | 0.389    | 0.0618   |
| Aminoacyl-tRNA biosynthesis                 | 48    | 1.17     | 5    | 0.00515  | 0.402    | 0.0618   |
| Nitrogen metabolism                         | 6     | 0.146    | 2    | 0.00811  | 0.625    | 0.0852   |

|                                                     |    |        |   |        |   |       |
|-----------------------------------------------------|----|--------|---|--------|---|-------|
| Valine, leucine and isoleucine biosynthesis         | 8  | 0.194  | 2 | 0.0147 | 1 | 0.137 |
| Cysteine and methionine metabolism                  | 33 | 0.802  | 3 | 0.0437 | 1 | 0.367 |
| Nicotinate and nicotinamide metabolism              | 15 | 0.365  | 2 | 0.0495 | 1 | 0.378 |
| Arginine and proline metabolism                     | 38 | 0.924  | 3 | 0.0622 | 1 | 0.436 |
| Tryptophan metabolism                               | 41 | 0.997  | 3 | 0.0748 | 1 | 0.484 |
| Phenylalanine, tyrosine and tryptophan biosynthesis | 4  | 0.0972 | 1 | 0.0938 | 1 | 0.563 |
| Glutathione metabolism                              | 28 | 0.681  | 2 | 0.147  | 1 | 0.821 |
| Thiamine metabolism                                 | 7  | 0.17   | 1 | 0.159  | 1 | 0.832 |
| Glyoxylate and dicarboxylate metabolism             | 32 | 0.778  | 2 | 0.181  | 1 | 0.896 |
| One carbon pool by folate                           | 9  | 0.219  | 1 | 0.199  | 1 | 0.919 |
| Glycerophospholipid metabolism                      | 36 | 0.875  | 2 | 0.217  | 1 | 0.919 |
| Phenylalanine metabolism                            | 10 | 0.243  | 1 | 0.219  | 1 | 0.919 |
| Pyrimidine metabolism                               | 39 | 0.948  | 2 | 0.245  | 1 | 0.969 |
| Valine, leucine and isoleucine degradation          | 40 | 0.972  | 2 | 0.254  | 1 | 0.969 |
| Histidine metabolism                                | 16 | 0.389  | 1 | 0.327  | 1 | 1     |
| Glycerolipid metabolism                             | 16 | 0.389  | 1 | 0.327  | 1 | 1     |
| Citrate cycle (TCA cycle)                           | 20 | 0.486  | 1 | 0.391  | 1 | 1     |
| Fructose and mannose metabolism                     | 20 | 0.486  | 1 | 0.391  | 1 | 1     |
| beta-Alanine metabolism                             | 21 | 0.511  | 1 | 0.406  | 1 | 1     |
| Pyruvate metabolism                                 | 22 | 0.535  | 1 | 0.42   | 1 | 1     |
| Lysine degradation                                  | 25 | 0.608  | 1 | 0.462  | 1 | 1     |
| Glycolysis / Gluconeogenesis                        | 26 | 0.632  | 1 | 0.475  | 1 | 1     |
| Inositol phosphate metabolism                       | 30 | 0.729  | 1 | 0.526  | 1 | 1     |
| Porphyrin and chlorophyll metabolism                | 30 | 0.729  | 1 | 0.526  | 1 | 1     |
| Fatty acid degradation                              | 39 | 0.948  | 1 | 0.622  | 1 | 1     |

| <i>eat-2</i> vs WT                     | total | expect ed | hits | Raw p    | Holm p   | FDR      |
|----------------------------------------|-------|-----------|------|----------|----------|----------|
| Aminoacyl-tRNA biosynthesis            | 48    | 2.05      | 12   | 2.75E-07 | 2.31E-05 | 2.31E-05 |
| D-Glutamine and D-glutamate metabolism | 6     | 0.256     | 4    | 4.27E-05 | 0.00355  | 0.00149  |

|                                                        |    |       |    |          |         |         |
|--------------------------------------------------------|----|-------|----|----------|---------|---------|
| Purine metabolism                                      | 65 | 2.78  | 11 | 5.32E-05 | 0.00436 | 0.00149 |
| Arginine biosynthesis                                  | 14 | 0.598 | 5  | 0.000181 | 0.0147  | 0.0038  |
| Nicotinate and nicotinamide metabolism                 | 15 | 0.641 | 4  | 0.0029   | 0.232   | 0.0487  |
| Valine, leucine and isoleucine biosynthesis            | 8  | 0.342 | 3  | 0.00357  | 0.282   | 0.05    |
| Arginine and proline metabolism                        | 38 | 1.62  | 6  | 0.00452  | 0.353   | 0.0542  |
| Alanine, aspartate and glutamate metabolism            | 28 | 1.2   | 5  | 0.00558  | 0.429   | 0.0586  |
| Pantothenate and CoA biosynthesis                      | 19 | 0.811 | 4  | 0.00724  | 0.55    | 0.0676  |
| Phenylalanine, tyrosine and tryptophan biosynthesis    | 4  | 0.171 | 2  | 0.0102   | 0.765   | 0.0856  |
| Nitrogen metabolism                                    | 6  | 0.256 | 2  | 0.0241   | 1       | 0.184   |
| beta-Alanine metabolism                                | 21 | 0.897 | 3  | 0.0571   | 1       | 0.399   |
| Phenylalanine metabolism                               | 10 | 0.427 | 2  | 0.0648   | 1       | 0.417   |
| Amino sugar and nucleotide sugar metabolism            | 37 | 1.58  | 4  | 0.0695   | 1       | 0.417   |
| Lysine degradation                                     | 25 | 1.07  | 3  | 0.0875   | 1       | 0.49    |
| Tryptophan metabolism                                  | 41 | 1.75  | 4  | 0.094    | 1       | 0.493   |
| Glutathione metabolism                                 | 28 | 1.2   | 3  | 0.114    | 1       | 0.563   |
| Butanoate metabolism                                   | 15 | 0.641 | 2  | 0.132    | 1       | 0.616   |
| Histidine metabolism                                   | 16 | 0.683 | 2  | 0.147    | 1       | 0.649   |
| Riboflavin metabolism                                  | 4  | 0.171 | 1  | 0.16     | 1       | 0.655   |
| Cysteine and methionine metabolism                     | 33 | 1.41  | 3  | 0.164    | 1       | 0.655   |
| Pyrimidine metabolism                                  | 39 | 1.67  | 3  | 0.23     | 1       | 0.88    |
| Valine, leucine and isoleucine degradation             | 40 | 1.71  | 3  | 0.242    | 1       | 0.884   |
| Thiamine metabolism                                    | 7  | 0.299 | 1  | 0.264    | 1       | 0.923   |
| Galactose metabolism                                   | 27 | 1.15  | 2  | 0.322    | 1       | 1       |
| Ubiquinone and other terpenoid-quinone biosynthesis    | 9  | 0.384 | 1  | 0.326    | 1       | 1       |
| One carbon pool by folate                              | 9  | 0.384 | 1  | 0.326    | 1       | 1       |
| Biotin metabolism                                      | 10 | 0.427 | 1  | 0.355    | 1       | 1       |
| Glyoxylate and dicarboxylate metabolism                | 32 | 1.37  | 2  | 0.401    | 1       | 1       |
| Glycine, serine and threonine metabolism               | 33 | 1.41  | 2  | 0.416    | 1       | 1       |
| Glycosylphosphatidylinositol (GPI)-anchor biosynthesis | 14 | 0.598 | 1  | 0.459    | 1       | 1       |

|                                      |    |       |   |       |   |   |
|--------------------------------------|----|-------|---|-------|---|---|
| Tyrosine metabolism                  | 42 | 1.79  | 2 | 0.544 | 1 | 1 |
| Citrate cycle (TCA cycle)            | 20 | 0.854 | 1 | 0.585 | 1 | 1 |
| Fructose and mannose metabolism      | 20 | 0.854 | 1 | 0.585 | 1 | 1 |
| Pentose phosphate pathway            | 22 | 0.94  | 1 | 0.62  | 1 | 1 |
| Pyruvate metabolism                  | 22 | 0.94  | 1 | 0.62  | 1 | 1 |
| Glycolysis / Gluconeogenesis         | 26 | 1.11  | 1 | 0.682 | 1 | 1 |
| Porphyrin and chlorophyll metabolism | 30 | 1.28  | 1 | 0.733 | 1 | 1 |
| Glycerophospholipid metabolism       | 36 | 1.54  | 1 | 0.796 | 1 | 1 |

**Supplemental Table 4:** Features submitted to PIUMet (linked to Fig. 1c).

| Molecular weight | Ion mode | Retention time |
|------------------|----------|----------------|
| 304.2038         | positive | 13.279         |
| 515.3015         | positive | 16.277         |
| 547.3632         | positive | 21.297         |
| 545.3481         | positive | 18.407         |
| 571.3638         | positive | 12.865         |
| 473.2481         | positive | 9.193          |
| 505.3173         | positive | 18.214         |
| 503.3008         | positive | 17.255         |
| 501.2798         | positive | 9.157          |
| 499.2689         | positive | 20.962         |
| 529.3117         | positive | 12.401         |
| 302.1882         | positive | 13.22          |
| 451.2699         | positive | 21.071         |
| 479.3007         | positive | 16.53          |
| 477.2855         | positive | 7.941          |
| 691.5157         | positive | 20.782         |
| 733.5593         | positive | 20.893         |
| 783.5728         | positive | 21.425         |
| 777.5297         | positive | 19.306         |
| 430.3083         | positive | 12.689         |
| 761.5826         | positive | 20.933         |
| 689.498          | positive | 17.538         |
| 687.4834         | positive | 20.952         |
| 737.4953         | positive | 20.323         |

|          |          |        |
|----------|----------|--------|
| 705.5304 | positive | 18.118 |
| 767.5449 | positive | 21.292 |
| 797.5915 | positive | 20.94  |
| 795.5716 | positive | 21.057 |
| 713.4955 | positive | 20.185 |
| 787.512  | positive | 20.737 |
| 120.0299 | positive | 2.14   |
| 727.55   | positive | 21.141 |
| 288.1725 | positive | 2.609  |
| 300.2089 | positive | 11.492 |
| 584.4441 | positive | 12.035 |
| 552.4748 | positive | 10.553 |
| 752.6327 | positive | 21.721 |
| 519.3207 | positive | 17.227 |
| 517.3163 | positive | 16.946 |
| 132.0774 | negative | 12.903 |
| 132.0775 | negative | 13.467 |
| 475.2696 | negative | 16.709 |
| 529.3168 | negative | 13.26  |
| 481.3168 | negative | 21.589 |
| 477.2855 | negative | 17.28  |
| 221.1048 | negative | 13.533 |
| 219.1103 | negative | 9.062  |
| 731.5445 | negative | 20.746 |
| 745.5598 | negative | 19.505 |
| 717.5306 | negative | 21.273 |
| 731.5793 | negative | 20.77  |
| 316.2191 | negative | 12.071 |
| 230.0192 | negative | 13.141 |
| 336.074  | negative | 8.142  |
| 536.0445 | negative | 2.428  |
| 147.0532 | negative | 3.493  |
| 515.3104 | negative | 13.023 |
| 543.3418 | negative | 13.435 |
| 541.3285 | negative | 17.104 |
| 567.3442 | negative | 17.645 |

**Supplemental Table 5:** PIUMet output and input (linked to Fig. 1c).

**PIUMet output**

Summary of the results, for the following parameters:

w=10.0 , beta=2.0, mu=0.0005, Da=0.01, R=1

The number of input terminals #peaks=25 , #Metabolites=0, #genes/proteins=0

155 peaks are matched to 162 metabolites in HMDB and Recon

5 peaks are matched to 52 metabolites in the PPMI network

The resulting network info:

-Number of nodes=21

-Number of edges=20

-Number of m/z peaks in the results=3

-Number of terminal metabolites in the results=0

-Number of terminal genes/proteins in the results=0

| Result node frequency      |                  |                                 |
|----------------------------|------------------|---------------------------------|
| Node name                  | Robustness score | Identifier                      |
| BTD                        | 1.0              | Protein                         |
| Acetoacetic acid           | 1.0              | Metabolite_Endogenous HMDB00060 |
| Thymidine                  | 1.0              | Metabolite_Endogenous HMDB00273 |
| DLD                        | 1.0              | Protein                         |
| SLC16A1                    | 1.0              | Protein                         |
| L-Valine                   | 1.0              | Metabolite_Food HMDB00883       |
| m/z=102.02699              | 1.0              | m/z Peak                        |
| Tetrahydrofolic acid       | 1.0              | Metabolite_Endogenous HMDB01846 |
| L-Lysine                   | 1.0              | Metabolite_Food HMDB00182       |
| BCAT1                      | 1.0              | Protein                         |
| SLC6A14                    | 1.0              | Protein                         |
| TYMS                       | 1.0              | Protein                         |
| FPGS                       | 1.0              | Protein                         |
| TK2                        | 1.0              | Protein                         |
| m/z=242.0980966            | 1.0              | m/z Peak                        |
| Biotin                     | 1.0              | Metabolite_Food HMDB00030       |
| m/z=130.05816              | 1.0              | m/z Peak                        |
| 3-Methyl-2-oxovaleric acid | 1.0              | Metabolite_Endogenous HMDB00491 |
| 5-Thymidylic acid          | 1.0              | Metabolite_Endogenous HMDB01227 |
| Dihydrofolic acid          | 1.0              | Metabolite_Endogenous HMDB01056 |

| Result edge frequency | robustness score | confidence score from PPI |
|-----------------------|------------------|---------------------------|
| L-Lysine (pp) BTD     | 1.0              | 0.99167591126             |
| L-Lysine (pp) SLC6A14 | 1.0              | 1                         |

|                                               |     |                |
|-----------------------------------------------|-----|----------------|
| Tetrahydrofolic acid (pp) FPGS                | 1.0 | 1              |
| Tetrahydrofolic acid (pp) DLD                 | 1.0 | 0.960227059495 |
| Thymidine (pp) TK2                            | 1.0 | 0.956973829155 |
| Thymidine (pp) m/z=242.0980966                | 1.0 | 0.969173076845 |
| Dihydrofolic acid (pp) TYMS                   | 1.0 | 1              |
| Dihydrofolic acid (pp) FPGS                   | 1.0 | 0.992540291593 |
| DLD (pp) 3-Methyl-2-oxovaleric acid           | 1.0 | 1              |
| TYMS (pp) 5-Thymidylic acid                   | 1.0 | 1              |
| 3-Methyl-2-oxovaleric acid (pp) m/z=130.05816 | 1.0 | 0.960673820791 |
| SLC6A14 (pp) L-Valine                         | 1.0 | 1              |
| BCAT1 (pp) 3-Methyl-2-oxovaleric acid         | 1.0 | 1              |
| BCAT1 (pp) L-Valine                           | 1.0 | 1              |
| m/z=130.05816 (pp) 3-Methyl-2-oxovaleric acid | 1.0 | 0.955639980233 |
| Biotin (pp) SLC16A1                           | 1.0 | 1              |
| Biotin (pp) BTD                               | 1.0 | 1              |
| SLC16A1 (pp) Acetoacetic acid                 | 1.0 | 1              |
| 5-Thymidylic acid (pp) TK2                    | 1.0 | 0.98263263268  |
| m/z=102.02699 (pp) Acetoacetic acid           | 1.0 | 1              |

**Supplemental Table 6:** Targeted metabolomic analysis of folates and methionine.

In each table, significance values are indicated below peak measurements.

| Figure 1d                                                                                                         |                                              |                              |                              |                              |                                |
|-------------------------------------------------------------------------------------------------------------------|----------------------------------------------|------------------------------|------------------------------|------------------------------|--------------------------------|
|                                                                                                                   | Average peak area normalized to control (WT) |                              |                              |                              |                                |
| Compounds                                                                                                         | WT                                           | <i>daf-2(e1370)</i>          | <i>isp-1(qm150)</i>          | <i>eat-2(ad465)</i>          | <i>glp-1(e2141ts)</i>          |
| FA                                                                                                                | 1.0000                                       | 3.9657                       | 1.8359                       | 2.2170                       | 0.9646                         |
| THF                                                                                                               | 1.0000                                       | 5.2470                       | 1.8451                       | 1.9509                       | 1.4456                         |
| 5MTHF                                                                                                             | 1.0000                                       | 0.4155                       | 0.5234                       | 0.3232                       | 1.1651                         |
| MN                                                                                                                | 1.0000                                       | 1.4457                       | 3.5562                       | 3.2902                       | 1.2650                         |
| ML                                                                                                                | 1.0000                                       | 0.1228                       | 0.7649                       | 0.5316                       | 1.2557                         |
| FO                                                                                                                | 1.0000                                       | 0.6266                       | 1.3589                       | 0.4206                       | 0.8029                         |
| Significance was assessed using one-way anova Dunnett's multiple comparisons test. * p<0.5, ** p<0.01, ***p<0.001 |                                              |                              |                              |                              |                                |
| Compounds                                                                                                         |                                              | <i>daf-2(e1370)</i><br>vs WT | <i>isp-1(qm150)</i><br>vs WT | <i>eat-2(ad465)</i><br>vs WT | <i>glp-1(e2141ts)</i><br>vs WT |
| FA                                                                                                                |                                              | 0.0017                       | 0.003                        | 0.0029                       | 0.9060                         |
| THF                                                                                                               |                                              | 0.0002                       | 0.019                        | 0.0254                       | 0.0211                         |
| 5MTHF                                                                                                             |                                              | 0.0002                       | 0.0291                       | 0.0002                       | 0.2447                         |
| ML                                                                                                                |                                              | 0.0303                       | 0.0033                       | <0.0001                      | 0.2571                         |
| MN                                                                                                                |                                              | <0.0001                      | 0.0987                       | 0.0032                       | 0.3388                         |



|    |  |        |        |        |        |
|----|--|--------|--------|--------|--------|
| FO |  | 0.0012 | 0.1126 | 0.0274 | 0.3756 |
|----|--|--------|--------|--------|--------|

**Figure 2c**

| Average peak area normalized to control (WT) |            |                     |                        |                |                            |                     |
|----------------------------------------------|------------|---------------------|------------------------|----------------|----------------------------|---------------------|
| Compounds                                    | Luciferase | Luciferase +10nM FA | Luciferase +10nM 5MTHF | <i>dhfr-1i</i> | <i>dhfr-1i</i> +10nM 5MTHF | <i>dhfr-1i</i> + FA |
| FA                                           | 1.0000     | 0.9621              | 1.0330                 | 2.0318         | 1.8614                     | 2.0724              |
| THF                                          | 1.0000     | 1.1318              | 2.1130                 | <LOD           | 1.1314                     | <LOD                |
| 5MTHF                                        | 1.0000     | 0.7106              | 1.5118                 | 0.4364         | 0.9588                     | 0.5186              |
| MN                                           | 1.0000     | 0.8732              | 1.4748                 | 0.3445         | 0.9179                     | 0.6020              |
| ML                                           | 1.0000     | 1.0180              | 1.0430                 | 0.5353         | 0.9549                     | 0.4592              |
| FO                                           | 1.0000     | 0.7715              | 0.8714                 | 0.4964         | 0.7587                     | 0.4572              |

Significance was assessed using one-way anova Dunnett's multiple comparisons test. \* p<0.5, \*\* p<0.01, \*\*\*p<0.001

| Compounds |  | Luciferase vs +10nM FA | Luciferase vs +10nM 5MTHF | Luciferase vs <i>dhfr-1i</i> | <i>dhfr-1i</i> vs <i>dhfr-1i</i> +10nM 5MTHF | Luciferase vs <i>dhfr-1i</i> + FA |
|-----------|--|------------------------|---------------------------|------------------------------|----------------------------------------------|-----------------------------------|
| FA        |  | 0.0001                 | 0.0001                    | 0.0001                       | 0.6577                                       | <0.0001                           |
| THF       |  | 0.7449                 | 0.0001                    | N.D                          | N.D                                          | N.D.                              |
| 5MTHF     |  | 0.0405                 | 0.0004                    | 0.0001                       | 0.0003                                       | 0.0035                            |
| MN        |  | 0.3897                 | 0.0001                    | 0.0001                       | 0.0001                                       | 0.0059                            |
| ML        |  | 0.9997                 | 0.9925                    | 0.0015                       | 0.0038                                       | <0.0001                           |
| FO        |  | 0.1707                 | 0.6493                    | 0.0009                       | 0.0965                                       | 0.0004                            |
|           |  |                        |                           |                              | N.D: refers to not detected                  |                                   |

**Figure 3b,c**

| Average peak area normalized to control (WT, Luciferase) |            |                      |                         |                              |                                              |  |
|----------------------------------------------------------|------------|----------------------|-------------------------|------------------------------|----------------------------------------------|--|
| Compounds                                                | Luciferase | Luciferase + 10nM FA | Luciferase + 10nM 5MTHF | Luciferase vs <i>dhfr-1i</i> | <i>dhfr-1i</i> vs <i>dhfr-1i</i> +10nM 5MTHF |  |
| Methionine                                               | 1.0000     | 0.8567               | 1.4985                  | 0.5713                       | 0.9839                                       |  |
| S-adenosyl methionine                                    | 1.0000     | 0.7471               | 1.4166                  | 0.5764                       | 1.1430                                       |  |
| S adenosyl Homocysteine                                  | 1.0000     | 1.4537               | 0.7469                  | 1.5948                       | 0.6804                                       |  |
| Homocysteine                                             | 1.0000     | 1.4126               | 0.6632                  | 1.6391                       | 0.4557                                       |  |

Significance was assessed using one-way anova Dunnett's multiple comparisons test. \* p<0.5, \*\* p<0.01, \*\*\*p<0.001

| Compounds               |  | Luciferase vs +10nM FA | Luciferase vs +10nM 5MTHF | Luciferase vs <i>dhfr-1i</i> | <i>dhfr-1i</i> vs <i>dhfr-1i</i> +10nM 5MTHF |  |
|-------------------------|--|------------------------|---------------------------|------------------------------|----------------------------------------------|--|
| Methionine              |  | 0.2930                 | 0.0001                    | 0.0005                       | 0.0007                                       |  |
| S-adenosyl methionine   |  | 0.0084                 | 0.0001                    | 0.0001                       | 0.0001                                       |  |
| S adenosyl Homocysteine |  | 0.0008                 | 0.0517                    | 0.0001                       | 0.0001                                       |  |
| Homocysteine            |  | 0.0001                 | 0.0007                    | 0.0001                       | 0.0001                                       |  |

| <b>Figure 5a</b>                                                                                                            |                                                     |                     |
|-----------------------------------------------------------------------------------------------------------------------------|-----------------------------------------------------|---------------------|
|                                                                                                                             | <b>Average peak area normalized to control (WT)</b> |                     |
| <b>Compounds</b>                                                                                                            | <b>WT</b>                                           | <b>daf-2(e1370)</b> |
| Methionine                                                                                                                  | 1.0000                                              | 0.85179             |
| S-adenosyl methionine                                                                                                       | 1.0000                                              | 0.71733             |
| Homocysteine                                                                                                                | 1.0000                                              | 1.59665             |
| Significance was assessed using two-sided t-test. Bar shows mean $\pm$ S.D, * $p < 0.5$ , ** $p < 0.01$ , *** $p < 0.001$ . |                                                     |                     |
| <b>Compounds</b>                                                                                                            |                                                     | <b>daf-2 vs WT</b>  |
| Methionine                                                                                                                  |                                                     | 0.1865              |
| S-adenosyl methionine                                                                                                       |                                                     | 0.0050              |
| Homocysteine                                                                                                                |                                                     | <0.0001             |

| <b>Figure 5c</b>                                                                                                                 |                                                     |                                         |
|----------------------------------------------------------------------------------------------------------------------------------|-----------------------------------------------------|-----------------------------------------|
| Brain                                                                                                                            | <b>Average peak area normalized to control (WT)</b> |                                         |
| <b>Compounds</b>                                                                                                                 | <b>WT</b>                                           | <b><i>Irs-1</i><sup>-/-</sup></b>       |
| FA                                                                                                                               | 1                                                   | 1.8670                                  |
| THF                                                                                                                              | 1                                                   | 2.0140                                  |
| 5MTHF                                                                                                                            | 1                                                   | 0.2272                                  |
| ML                                                                                                                               | 1                                                   | 1.4830                                  |
| MN                                                                                                                               | 1                                                   | 0.3860                                  |
| FO                                                                                                                               | 1                                                   | 0.6702                                  |
| Significance was assessed using one-way anova Dunnett's multiple comparisons test. * $p < 0.5$ , ** $p < 0.01$ , *** $p < 0.001$ |                                                     |                                         |
| <b>Compounds</b>                                                                                                                 |                                                     | <b><i>Irs-1</i><sup>-/-</sup> vs WT</b> |
| FA                                                                                                                               |                                                     | <0.0001                                 |
| THF                                                                                                                              |                                                     | <0.0001                                 |
| 5MTHF                                                                                                                            |                                                     | <0.0001                                 |
| ML                                                                                                                               |                                                     | 0.0117                                  |
| MN                                                                                                                               |                                                     | 0.0008                                  |
| FO                                                                                                                               |                                                     | 0.1681                                  |

| <b>Figure 5e</b> |                                                     |                                   |
|------------------|-----------------------------------------------------|-----------------------------------|
| Liver            | <b>Average peak area normalized to control (WT)</b> |                                   |
| <b>Compounds</b> | <b>WT</b>                                           | <b><i>Irs-1</i><sup>-/-</sup></b> |

|                                                                                                                   |   |                       |
|-------------------------------------------------------------------------------------------------------------------|---|-----------------------|
| FA                                                                                                                | 1 | 1.8740                |
| THF                                                                                                               | 1 | 2.3910                |
| 5MTHF                                                                                                             | 1 | 0.2990                |
| ML                                                                                                                | 1 | 1.1520                |
| MN                                                                                                                | 1 | 0.2509                |
| FO                                                                                                                | 1 | 0.4898                |
| Significance was assessed using one-way anova Dunnett's multiple comparisons test. * p<0.5, ** p<0.01, ***p<0.001 |   |                       |
| <b>Compounds</b>                                                                                                  |   | <b>Irs-1-/- vs WT</b> |
| FA                                                                                                                |   | 0.0007                |
| THF                                                                                                               |   | <0.0001               |
| 5MTHF                                                                                                             |   | 0.0089                |
| ML                                                                                                                |   | 0.9778                |
| MN                                                                                                                |   | 0.0045                |
| FO                                                                                                                |   | 0.1027                |

|                                                                                                                   |                                                     |                       |
|-------------------------------------------------------------------------------------------------------------------|-----------------------------------------------------|-----------------------|
| <b>Figure 5d</b>                                                                                                  |                                                     |                       |
| Brain                                                                                                             | <b>Average peak area normalized to control (WT)</b> |                       |
| <b>Compounds</b>                                                                                                  | <b>WT</b>                                           | <b>Irs-1-/-</b>       |
| Methionine                                                                                                        | 1                                                   | 0.43420               |
| S-adenosylmethionine                                                                                              | 1                                                   | 0.59479               |
| Homocysteine                                                                                                      | 1                                                   | 5.33974               |
| Significance was assessed using one-way anova Dunnett's multiple comparisons test. * p<0.5, ** p<0.01, ***p<0.001 |                                                     |                       |
| <b>Compounds</b>                                                                                                  |                                                     | <b>Irs-1-/- vs WT</b> |
| Methionine                                                                                                        |                                                     | 0.0017                |
| S-adenosylmethionine                                                                                              |                                                     | 0.0006                |
| Homocysteine                                                                                                      |                                                     | 0.0040                |

|                      |                                                     |                 |
|----------------------|-----------------------------------------------------|-----------------|
| <b>Figure 5f</b>     |                                                     |                 |
| Liver                | <b>Average peak area normalized to control (WT)</b> |                 |
| <b>Compounds</b>     | <b>WT</b>                                           | <b>Irs-1-/-</b> |
| Methionine           | 1                                                   | 0.47328         |
| S-adenosylmethionine | 1                                                   | 0.32255         |
| Homocysteine         | 1                                                   | 2.62672         |

Significance was assessed using one-way anova  
Dunnett's multiple comparisons test. \* p<0.5, \*\* p<0.01,  
\*\*\*p<0.001

| <b>Compounds</b>     |  | <b>Irs-1-/- vs WT</b> |
|----------------------|--|-----------------------|
| Methionine           |  | 0.0018                |
| S-adenosylmethionine |  | 0.0003                |
| Homocysteine         |  | 0.0024                |

**Supplemental Table 7: Lifespan Analyses.**

| Figure 2a |                   |         |            |        |           |           |              |                           |                      |                              |
|-----------|-------------------|---------|------------|--------|-----------|-----------|--------------|---------------------------|----------------------|------------------------------|
| Strains   | Treatment/RNAi    | Mean LS | Mean Diff. | Max LS | Max Diff. | Median LS | Median Diff. | Log-rank(Mantel-Cox) test | Comparison           | Replicates                   |
| WT        | <i>luciferase</i> | 18.54   | 0.00%      | 28     | 0.00%     | 17        | 0.00%        |                           |                      | BR1<br>Shown in<br>Figure 2a |
| WT        | <i>dhfr-1i</i>    | 23.87   | 28.77%     | 36     | 28.57%    | 24        | 24.18%       | < 0.0001                  | <i>vs luciferase</i> |                              |
| WT        | <i>tym-1i</i>     | 22.28   | 20.18%     | 36     | 28.57%    | 21        | 23.53%       | 0.0001                    | <i>vs luciferase</i> |                              |
| WT        | <i>daf-2i</i>     | 32.58   | 75.75%     | 58     | 107.14%   | 32        | 88.24%       | < 0.0001                  | <i>vs luciferase</i> |                              |
| WT        | <i>luciferase</i> | 16.42   | 0.00%      | 30     | 0.00%     | 17        | 0.00%        |                           |                      | BR2                          |
| WT        | <i>dhfr-1i</i>    | 21.57   | 31.41%     | 36     | 20.00%    | 21        | 23.53%       | 0.0002                    | <i>vs luciferase</i> |                              |
| WT        | <i>tym-1i</i>     | 21.28   | 29.65%     | 34     | 13.33%    | 21        | 23.53%       | 0.0003                    | <i>vs luciferase</i> |                              |
| WT        | <i>daf-2i</i>     | 30.18   | 83.83%     | 60     | 100.00%   | 28        | 64.71%       | < 0.0001                  | <i>vs luciferase</i> |                              |
| WT        | <i>luciferase</i> | 16.00   | 0.00%      | 28     | 0.00%     | 17        | 0.00%        |                           |                      | BR3                          |
| WT        | <i>dhfr-1i</i>    | 21.36   | 30.10%     | 34     | 21.43%    | 21        | 23.53%       | 0.0002                    | <i>vs luciferase</i> |                              |
| WT        | <i>tym-1i</i>     | 20.88   | 27.18%     | 36     | 28.57%    | 21        | 23.53%       | 0.0007                    | <i>vs luciferase</i> |                              |
| WT        | <i>daf-2i</i>     | 28.74   | 75.07%     | 56     | 100.00%   | 28        | 64.71%       | < 0.0001                  | <i>vs luciferase</i> |                              |

| Figure 2b, Extended data Fig. 3b |                                |         |            |        |           |           |              |                           |                      |                              |
|----------------------------------|--------------------------------|---------|------------|--------|-----------|-----------|--------------|---------------------------|----------------------|------------------------------|
| Strains                          | Treatment/RNAi                 | Mean LS | Mean Diff. | Max LS | Max Diff. | Median LS | Median Diff. | Log-rank(Mantel-Cox) test | Comparison           | Replicates                   |
| WT                               | <i>luciferase</i>              | 21.01   | 0.00%      | 29.00  | 0.00%     | 23.00     | 0.00%        |                           |                      | BR1<br>Shown in<br>Figure 2b |
| WT                               | <i>luciferase</i> +10 nM FA    | 19.89   | -5.34%     | 29.00  | 0.00%     | 21.00     | -8.70%       | 0.0621                    | <i>vs luciferase</i> |                              |
| WT                               | <i>luciferase</i> +10 nM 5MTHF | 21.01   | 0.02%      | 30.00  | 3.45%     | 21.00     | -8.70%       | 0.9067                    | <i>vs luciferase</i> |                              |
| WT                               | <i>dhfr-1i</i>                 | 25.79   | 22.75%     | 39.00  | 34.48%    | 25.00     | 8.70%        | <0.0001                   | <i>vs luciferase</i> |                              |
| WT                               | <i>dhfr-1i</i> + 10nM 5MTHF    | 20.57   | -2.10%     | 29.00  | 0.00%     | 21.00     | -8.70%       | <0.0001                   | <i>vs dhfr-1i</i>    |                              |
| WT                               | <i>dhfr-1i</i> + 10nM FA       | 25.01   | 19.04%     | 36     | 24.14%    | 22.00     | -4.35%       | <0.0001                   | <i>vs luciferase</i> |                              |
| WT                               | <i>luciferase</i>              | 20.30   | 0.00%      | 29.00  | 0.00%     | 19.00     | 0.00%        |                           |                      | BR2                          |

|    |                                |       |        |       |        |       |        |         |                      |     |
|----|--------------------------------|-------|--------|-------|--------|-------|--------|---------|----------------------|-----|
| WT | <i>luciferase</i> +10 nM FA    | 19.20 | -5.40% | 29.00 | 0.00%  | 19.00 | 0.00%  | 0.238   | <i>vs luciferase</i> | BR3 |
| WT | <i>luciferase</i> +10 nM 5MTHF | 20.17 | -0.62% | 30.00 | 3.45%  | 19.00 | 0.00%  | 0.5604  | <i>vs luciferase</i> |     |
| WT | <i>dhfr-1i</i>                 | 23.82 | 17.36% | 39.00 | 34.48% | 23.00 | 21.05% | <0.0001 | <i>vs luciferase</i> |     |
| WT | <i>dhfr-1i</i> + 10nM 5MTHF    | 21.19 | 4.39%  | 29.00 | 0.00%  | 21.00 | 10.53% | 0.0017  | <i>vs dhfr-1i</i>    |     |
| WT | <i>dhfr-1i</i> + 10nM FA       | 24.50 | 20.69% | 39.00 | 34.48% | 22    | 15.79% | <0.0001 | <i>vs luciferase</i> |     |
| WT | <i>luciferase</i>              | 22.02 | 0.00%  | 30.00 | 0.00%  | 23.00 | 0.00%  |         |                      |     |
| WT | <i>luciferase</i> +10 nM FA    | 22.17 | 0.68%  | 32.00 | 0.00%  | 21.00 | 0.00%  | 0.6638  | <i>vs luciferase</i> |     |
| WT | <i>luciferase</i> +10 nM 5MTHF | 21.95 | -0.30% | 32.00 | 0.00%  | 21.00 | 0.00%  | 0.8677  | <i>Vs luciferase</i> |     |
| WT | <i>dhfr-1i</i>                 | 25.78 | 22.80% | 39.00 | 21.88% | 25.00 | 8.69%  | 0.0146  | <i>vs luciferase</i> |     |
| WT | <i>dhfr-1i</i> + 10nM 5MTHF    | 20.80 | -5.53% | 32.00 | 0.00%  | 21.00 | -8.70% | 0.0029  | <i>vs dhfr-1i</i>    |     |
| WT | <i>dhfr-1i</i> + 10nM FA       | 26.30 | 19.00% | 36    | 20.00% | 25    | 8.69%  | 0.0124  | <i>vs luciferase</i> |     |

**Figure 3e**

| Strains | Treatment/RNAi                      | Mean LS | Mean Diff. | Max LS | Max Diff. | Median LS | Median Diff. | Log-rank(Mantel-Cox) test | Comparison           | Replicates                   |
|---------|-------------------------------------|---------|------------|--------|-----------|-----------|--------------|---------------------------|----------------------|------------------------------|
| WT      | <i>luciferase</i>                   | 24.20   |            | 30     |           | 28        |              |                           |                      | BR1<br>Shown in<br>Figure 3e |
| WT      | <i>luciferase</i> + 20mM methionine | 23.88   | -0.55%     | 32     | 6.67%     | 28        | 0.00%        | 0.8479                    | <i>vs luciferase</i> |                              |
| WT      | <i>luciferase</i> + 40mM methionine | 24.20   | 0.76%      | 30     | 0.00%     | 28        | 0.00%        | 0.9103                    | <i>vs luciferase</i> |                              |
| WT      | <i>dhfr-1i</i>                      | 29.70   | 23.66%     | 38     | 26.67%    | 32        | 14.29%       | <0.0001                   | <i>vs luciferase</i> |                              |
| WT      | <i>dhfr-1i</i> + 20mM methionine    | 28.00   | 16.57%     | 34     | 13.33%    | 30        | 7.14%        | <0.0001                   | <i>vs luciferase</i> |                              |
|         |                                     |         |            |        |           |           |              | 0.0078                    | <i>vs dhfr-1i</i>    |                              |
| WT      | <i>dhfr-1i</i> + 20mM methionine    | 24.10   | 0.37%      | 30     | 0.00%     | 28        | 0.00%        | 0.5484                    | <i>vs luciferase</i> |                              |
|         |                                     |         |            |        |           |           |              | <0.0001                   | <i>vs dhfr-1i</i>    |                              |
| WT      | <i>luciferase</i>                   | 22.87   |            | 28     |           | 24        |              |                           |                      | BR2                          |

|    |                                           |        |        |    |        |    |        |         |                      |     |
|----|-------------------------------------------|--------|--------|----|--------|----|--------|---------|----------------------|-----|
| WT | <i>luciferase</i> +<br>20mM<br>methionine | 22.46  | -1.78% | 30 | 7.14%  | 24 | 0.00%  | 0.3737  | <i>vs luciferase</i> |     |
| WT | <i>luciferase</i> +<br>40mM<br>methionine | 22.14  | -3.19% | 28 | 0.00%  | 24 | 0.00%  | 0.2172  | <i>vs luciferase</i> |     |
| WT | <i>dhfr-1i</i>                            | 28.43  | 24.32% | 36 | 28.57% | 30 | 25.00% | <0.0001 | <i>vs luciferase</i> |     |
| WT | <i>dhfr-1i</i> + 20mM<br>methionine       | 27.005 | 18.08% | 34 | 21.43% | 28 | 16.67% | <0.0001 | <i>vs luciferase</i> |     |
|    |                                           |        |        |    |        |    |        | 0.0605  | <i>vs dhfr-1i</i>    |     |
| WT | <i>dhfr-1i</i> + 20mM<br>methionine       | 22.53  | -1.45% | 30 | 7.14%  | 24 | 0.00%  | 0.8635  | <i>vs luciferase</i> |     |
|    |                                           |        |        |    |        |    |        | <0.0001 | <i>vs dhfr-1i</i>    |     |
| WT | <i>luciferase</i>                         | 22.77  |        | 30 | 0.00%  | 24 |        |         |                      | BR3 |
| WT | <i>luciferase</i> +<br>20mM<br>methionine | 22.47  | -1.28% | 30 | 0.00%  | 24 | -7.69% | 0.3198  | <i>vs luciferase</i> |     |
| WT | <i>luciferase</i> +<br>40mM<br>methionine | 24.46  | 7.43%  | 30 | 0.00%  | 26 | 0.00%  | 0.4931  | <i>vs luciferase</i> |     |
| WT | <i>dhfr-1i</i>                            | 28.33  | 24.43% | 34 | 13.33% | 30 | 15.38% | <0.0001 | <i>vs luciferase</i> |     |
| WT | <i>dhfr-1i</i> + 20mM<br>methionine       | 26.73  | 17.41% | 32 | 6.67%  | 30 | 15.38% | <0.0001 | <i>vs luciferase</i> |     |
|    |                                           |        |        |    |        |    |        | 0.0367  | <i>vs dhfr-1i</i>    |     |
| WT | <i>dhfr-1i</i> + 20mM<br>methionine       | 23.00  | 1.02%  | 30 | 0.00%  | 26 | 0.00%  | 0.8987  | <i>vs luciferase</i> |     |
|    |                                           |        |        |    |        |    |        | <0.0001 | <i>vs dhfr-1i</i>    |     |

| Figure 4a,b           |                                   |         |            |        |           |           |              |                           |                                               |                                   |
|-----------------------|-----------------------------------|---------|------------|--------|-----------|-----------|--------------|---------------------------|-----------------------------------------------|-----------------------------------|
| Strains               | Treatment/RNAi                    | Mean LS | Mean Diff. | Max LS | Max Diff. | Median LS | Median Diff. | Log-rank(Mantel-Cox) test | Comparison                                    | Replicates                        |
| WT                    |                                   | 21.90   | 0.00%      | 31.00  | 0.00%     | 22.00     | 0.00%        |                           |                                               | BR1<br>Shown in<br>Figure<br>4a,b |
| <i>daf-2(e1370)</i>   |                                   | 41.93   | 91.55%     | 62.00  | 100.00%   | 41.00     | 86.36%       | <0.0001                   | vs WT                                         |                                   |
| <i>daf-2(e1370)</i>   | +10nM 5MTHF                       | 38.94   | 77.91%     | 57.00  | 83.87%    | 22.00     | 77.27%       | 0.0208                    | vs <i>daf-2(e1370)</i>                        |                                   |
| <i>isp-1(qm150)</i>   |                                   | 29.86   | 36.39%     | 44.00  | 41.94%    | 29.00     | 31.82%       | <0.0001                   | vs WT                                         |                                   |
| <i>isp-1(qm150)</i>   | +10nM 5MTHF                       | 27.01   | 23.40%     | 34.00  | 9.68%     | 29.00     | 31.82%       | 0.001                     | vs <i>isp-1(qm150)</i>                        |                                   |
| WT                    |                                   | 23.05   | 0.00%      | 31.00  | 0.00%     | 24.00     | 0.00%        |                           |                                               | BR2                               |
| <i>daf-2(e1370)</i>   |                                   | 42.87   | 86.00%     | 64.00  | 106.45%   | 41.00     | 70.83%       | <0.0001                   | vs WT                                         |                                   |
| <i>daf-2(e1370)</i>   | +10nM 5MTHF                       | 39.21   | 70.11%     | 57.00  | 83.87%    | 37.00     | 54.17%       | 0.013                     | vs <i>daf-2(e1370)</i>                        |                                   |
| <i>isp-1(qm150)</i>   |                                   | 30.15   | 30.78%     | 44.00  | 41.94%    | 31.00     | 29.17%       | <0.0001                   | vs WT                                         |                                   |
| <i>isp-1(qm150)</i>   | +10nM 5MTHF                       | 27.19   | 17.97%     | 34.00  | 9.68%     | 29.00     | 20.83%       | 0.0011                    | vs <i>isp-1(qm150)</i>                        |                                   |
| WT                    |                                   | 20.68   | 0.00%      | 31.00  | 0.00%     | 24.00     | 0.00%        |                           |                                               | BR3                               |
| <i>daf-2(e1370)</i>   |                                   | 41.22   | 99.31%     | 62.00  | 100.00%   | 41.00     | 70.83%       | <0.0001                   | vs WT                                         |                                   |
| <i>daf-2(e1370)</i>   | +10nM 5MTHF                       | 29.21   | 41.27%     | 48.00  | 54.84%    | 35.00     | 45.83%       | <0.0001                   | vs <i>daf-2(e1370)</i>                        |                                   |
| <i>isp-1(qm150)</i>   |                                   | 26.59   | 28.59%     | 44.00  | 41.94%    | 26.00     | 8.33%        | <0.0001                   | vs WT                                         |                                   |
| <i>isp-1(qm150)</i>   | +10nM 5MTHF                       | 23.51   | 13.67%     | 34.00  | 9.68%     | 24.00     | 0.00%        | 0.0019                    | vs <i>isp-1(qm150)</i>                        |                                   |
| Figure 4e             |                                   |         |            |        |           |           |              |                           |                                               |                                   |
| Strains               | Treatment/RNAi                    | Mean LS | Mean Diff. | Max LS | Max Diff. | Median LS | Median Diff. | Log-rank(Mantel-Cox) test | Comparison                                    | Replicates                        |
| WT                    | <i>luciferase</i>                 | 21.67   | 0.00%      | 32.00  | 0.00%     | 21.00     | 0.00%        |                           |                                               | BR1<br>Shown in<br>Figure 4e      |
| WT                    | <i>dhfr-1i</i>                    | 25.36   | 17.03%     | 39.00  | 21.88%    | 28.00     | 33.33%       | <0.0001                   | vs <i>luciferase</i>                          |                                   |
| <i>daf-16(mgDf50)</i> | <i>luciferase</i>                 | 10.48   | -51.62%    | 21.00  | -34.38%   | 9.00      | -57.14%      | <0.0001                   | vs <i>luciferase</i>                          |                                   |
| <i>daf-16(mgDf50)</i> | <i>luciferase</i> +<br>10nM 5MTHF | 9.91    | -54.27%    | 23.00  | -28.13%   | 9.00      | -57.14%      | 0.5068                    | vs <i>daf-16(mgDf50)</i><br><i>luciferase</i> |                                   |
| <i>daf-16(mgDf50)</i> | <i>dhfr-1i</i>                    | 12.26   | -43.40%    | 25.00  | -21.88%   | 14.00     | -33.33%      | <0.0001                   | vs <i>daf-16(mgDf50)</i><br><i>luciferase</i> |                                   |
| <i>daf-16(mgDf50)</i> | <i>dhfr-1i</i> + 10nM<br>5MTHF    | 10.77   | -50.27%    | 23.00  | -28.13%   | 11.00     | -47.62%      | 0.0005                    | vs <i>daf-16(mgDf50)</i><br><i>dhfr-1i</i>    |                                   |



|                       |                                |       |         |       |         |       |         |         |                                     |     |
|-----------------------|--------------------------------|-------|---------|-------|---------|-------|---------|---------|-------------------------------------|-----|
| WT                    | <i>luciferase</i>              | 21.21 | 0.00%   | 32.00 | 0.00%   | 21.00 | 0.00%   |         |                                     | BR2 |
| WT                    | <i>dhfr-1i</i>                 | 23.51 | 10.84%  | 39.00 | 21.88%  | 23.00 | 9.52%   | <0.0001 | <i>vs luciferase</i>                |     |
| <i>daf-16(mgDf50)</i> | <i>luciferase</i>              | 11.33 | -46.59% | 23.00 | -28.13% | 11.00 | -47.62% | <0.0001 | <i>vs luciferase</i>                |     |
| <i>daf-16(mgDf50)</i> | <i>Luciferase + 10nM 5MTHF</i> | 12.49 | -41.12% | 23.00 | -28.13% | 14.00 | -33.33% | 0.1181  | <i>vs daf-16(mgDf50) luciferase</i> |     |
| <i>daf-16(mgDf50)</i> | <i>dhfr-1i</i>                 | 12.16 | -42.69% | 25.00 | -21.88% | 11.00 | -47.62% | 0.3298  | <i>vs daf-16(mgDf50) luciferase</i> |     |
| <i>daf-16(mgDf50)</i> | <i>dhfr-1i + 10nM 5MTHF</i>    | 9.77  | -53.91% | 23.00 | -28.13% | 9.00  | -57.14% | 0.9341  | <i>vs daf-16(mgDf50) dhfr-1i</i>    |     |
| WT                    | <i>luciferase</i>              | 18.94 | 0.00%   | 30.00 | 0.00%   | 19.00 | 0.00%   |         |                                     | BR3 |
| WT                    | <i>dhfr-1i</i>                 | 22.61 | 19.62%  | 35.00 | 16.67%  | 23.00 | 21.05%  | 0.0029  | <i>vs luciferase</i>                |     |
| <i>daf-16(mgDf50)</i> | <i>luciferase</i>              | 11.35 | -39.96% | 23.00 | -23.33% | 11.00 | -42.11% | <0.0001 | <i>vs luciferase</i>                |     |
| <i>daf-16(mgDf50)</i> | <i>luciferase + 10nM 5MTHF</i> | 10.12 | -46.43% | 23.00 | -23.33% | 9.00  | -52.63% | 0.1209  | <i>vs daf-16(mgDf50) luciferase</i> |     |
| <i>daf-16(mgDf50)</i> | <i>dhfr-1i</i>                 | 12.53 | -33.69% | 25.00 | -16.67% | 11.00 | -42.11% | 0.0978  | <i>vs daf-16(mgDf50) luciferase</i> |     |
| <i>daf-16(mgDf50)</i> | <i>dhfr-1i + 10nM 5MTHF</i>    | 10.72 | -43.27% | 23.00 | -23.33% | 9.00  | -52.63% | 0.0019  | <i>vs daf-16(mgDf50) dhfr-1i</i>    |     |
|                       |                                |       |         |       |         |       |         |         |                                     |     |

| Extended Data Fig 3g |                   |         |            |        |           |           |              |                           |                      |           |
|----------------------|-------------------|---------|------------|--------|-----------|-----------|--------------|---------------------------|----------------------|-----------|
| Strains              | Treatment/RNAi    | Mean LS | Mean Diff. | Max LS | Max Diff. | Median LS | Median Diff. | Log-rank(Mantel-Cox) test | Comparison           | Replicate |
| WT                   | <i>luciferase</i> | 18.54   | 0.00%      | 28     | 0.00%     | 17        | 0.00%        |                           |                      | BR1       |
| WT                   | <i>mthfr-1i</i>   | 20.61   | 3.28%      | 30     | 0.00%     | 21        | 0.00%        | 0.075                     | <i>vs luciferase</i> |           |
| WT                   | <i>mel-32i</i>    | 17.72   | -0.11%     | 28     | 0.00%     | 17        | 0.00%        | 0.356                     | <i>vs luciferase</i> |           |
| WT                   | <i>tyms-1i</i>    | 24.12   | 28.60%     | 36     | 21.43%    | 24        | 23.53%       | < 0.0001                  | <i>vs luciferase</i> |           |
| WT                   | <i>dhfr-1i</i>    | 23.89   | 36.04%     | 36     | 28.57%    | 24        | 23.53%       | < 0.0001                  | <i>vs luciferase</i> |           |
| WT                   | <i>F38B6.4i</i>   | 17.81   | 12.89%     | 28     | 7.14%     | 19        | 0.00%        | 0.3076                    | <i>vs luciferase</i> |           |
| WT                   | <i>daf-2i</i>     | 33.68   | 100.20%    | 58     | 114.29%   | 32        | 88.24%       | < 0.0001                  | <i>vs luciferase</i> |           |

|    |                   |       |        |    |         |    |        |          |                      |     |
|----|-------------------|-------|--------|----|---------|----|--------|----------|----------------------|-----|
| WT | <i>dao-3i</i>     | 16.05 | 9.18%  | 30 | 0.00%   | 15 | 11.76% | 0.0718   | <i>vs luciferase</i> | BR2 |
| WT | <i>luciferase</i> | 16.98 | 0.00%  | 30 | 0.00%   | 17 | 0.00%  |          |                      |     |
| WT | <i>methfr-1i</i>  | 17.08 | 0.60%  | 28 | -6.67%  | 17 | 0.00%  | 0.8436   | <i>vs luciferase</i> |     |
| WT | <i>mel-32i</i>    | 16.52 | -2.70% | 28 | -6.67%  | 17 | 0.00%  | 0.5554   | <i>vs luciferase</i> |     |
| WT | <i>tyms-1i</i>    | 21.27 | 25.26% | 34 | 13.33%  | 21 | 23.53% | 0.0001   | <i>vs luciferase</i> |     |
| WT | <i>dhfr-1i</i>    | 22.50 | 32.51% | 36 | 20.00%  | 21 | 23.53% | < 0.0001 | <i>vs luciferase</i> |     |
| WT | <i>F38B6.4i</i>   | 18.67 | 9.96%  | 30 | 0.00%   | 17 | 0.00%  | 0.129    | <i>vs luciferase</i> |     |
| WT | <i>daf-2i</i>     | 33.11 | 95.02% | 60 | 100.00% | 32 | 88.24% | < 0.0001 | <i>vs luciferase</i> |     |
| WT | <i>dao-3i</i>     | 18.06 | 6.35%  | 28 | -6.67%  | 19 | 11.76% | 0.583    | <i>vs luciferase</i> |     |
| WT | <i>luciferase</i> | 24.54 |        | 30 |         | 28 |        |          |                      | BR3 |
| WT | <i>methfr-1i</i>  | 24.48 | 0.00%  | 30 | 0.00%   | 28 | 0.00%  | 0.8407   | <i>vs luciferase</i> |     |
| WT | <i>mel-32i</i>    | 24.17 | -1.33% | 30 | 0.00%   | 28 | 0.00%  | 0.3837   | <i>vs luciferase</i> |     |
| WT | <i>tyms-1i</i>    | 29.79 | 21.62% | 36 | 20.00%  | 32 | 14.29% | <0.0001  | <i>vs luciferase</i> |     |
| WT | <i>dhfr-1i</i>    | 28.56 | 20.67% | 36 | 20.00%  | 32 | 14.29% | <0.0001  | <i>vs luciferase</i> |     |
| WT | <i>F38B6.4i</i>   | 24.29 | -0.84% | 30 | 0.00%   | 28 | 0.00%  | 0.9254   | <i>vs luciferase</i> |     |
| WT | <i>daf-2i</i>     | 45.97 | 87.63% | 55 | 83.33%  | 52 | 85.71% | <0.0001  | <i>vs luciferase</i> |     |
| WT | <i>dao-3i</i>     | 25.61 | 4.56%  | 32 | 6.67%   | 28 | 0.00%  | 0.1578   | <i>vs luciferase</i> |     |
|    |                   |       |        |    |         |    |        |          |                      |     |

| Extended data Fig. 5d |                   |         |            |        |           |           |              |                           |                      |           |
|-----------------------|-------------------|---------|------------|--------|-----------|-----------|--------------|---------------------------|----------------------|-----------|
| Strains               | Treatment/RNAi    | Mean LS | Mean Diff. | Max LS | Max Diff. | Median LS | Median Diff. | Log-rank(Mantel-Cox) test | Comparison           | Replicate |
| WT                    | <i>luciferase</i> | 16.25   | 0%         | 30     | 0%        | 19        | 0%           |                           |                      | BR1       |
| WT                    | <i>dhfr-1i</i>    | 21.63   | 33.14%     | 36     | 20%       | 22        | 15.79%       | 0.0004                    | <i>vs luciferase</i> |           |
| <i>daf-2(e1370)</i>   | <i>luciferase</i> | 30.35   | 86.79%     | 54     | 80%       | 32        | 68.42%       | <0.0001                   | <i>vs luciferase</i> |           |

|                     |                   |       |        |    |         |    |        |         |                        |     |
|---------------------|-------------------|-------|--------|----|---------|----|--------|---------|------------------------|-----|
| <i>daf-2(e1370)</i> | <i>dhfr-1i</i>    | 29.56 | 81.97% | 54 | 80%     | 30 | 57.89% | <0.0001 | <i>vs luciferase</i>   | BR2 |
|                     |                   |       |        |    |         |    |        | 0.2610  | <i>vs daf-2(e1370)</i> |     |
| WT                  | <i>luciferase</i> | 18.53 | 0%     | 28 | 0%      | 17 | 0%     |         |                        |     |
| WT                  | <i>dhfr-1i</i>    | 23.91 | 31.20% | 35 | 25%     | 22 | 29.41% | 0.0004  | <i>vs luciferase</i>   |     |
| <i>daf-2(e1370)</i> | <i>luciferase</i> | 31.43 | 69.59% | 58 | 107.14% | 30 | 76.47% | <0.0001 | <i>vs luciferase</i>   |     |
| <i>daf-2(e1370)</i> | <i>dhfr-1i</i>    | 29.97 | 61.67% | 58 | 107.14% | 30 | 76.47% | <0.0001 | <i>vs luciferase</i>   |     |
|                     |                   |       |        |    |         |    |        | 0.3458  | <i>vs daf-2(e1370)</i> |     |

**Supplemental Table 8:** List of gene activation upon methionine restriction validated by qRT-PCR according to Tang *et al* (linked to Figure 3d, Figure 5b).

| Gene Symbol<br><i>H. sapiens</i> | Gene Title                                                                                                     | Delta FC<br>(to the control) | <i>C. elegans</i><br><i>orthologues</i> | BLAST e value |
|----------------------------------|----------------------------------------------------------------------------------------------------------------|------------------------------|-----------------------------------------|---------------|
| ERBB2                            | v-erb-b2 erythroblastic leukemia viral oncogene homolog 2, neuro/glioblastoma derived oncogene homolog (avian) | 1.23766075                   | <i>let-23</i>                           | 2.00E-77      |
| DAG1                             | dystroglycan 1 (dystrophin-associated glycoprotein 1)                                                          | 1.3569075                    | <i>dgn-1</i>                            | 2.00E-14      |
| PTEN                             | phosphatase and tensin homolog (mutated in multiple advanced cancers 1)                                        | 1.169589                     | <i>daf-18</i>                           | 6.00E-50      |
| DAPK3                            | death-associated protein kinase 3                                                                              | 2.06537275                   | <i>dapk-1</i>                           | 0             |
| ING2                             | inhibitor of growth family, member 2                                                                           | 1.16491675                   | <i>ing-3</i>                            | 4.00E-18      |
| TEX14                            | testis expressed sequence 14 /// testis expressed sequence 14                                                  | 4.057606                     | Not found                               |               |

**Supplemental Table 9:** Strains used in this study.

| AA numbers/Strains: | Genotype:                              |
|---------------------|----------------------------------------|
|                     | <b><i>N2 (wild type, WT)</i></b>       |
| <b>AA3561</b>       | <i>glp-1 (e2141)ts III</i>             |
| <b>CB1370</b>       | <i>daf-2(e1370) III</i>                |
| <b>MQ887</b>        | <i>isp-1(qm150) IV</i>                 |
| <b>DA465</b>        | <i>eat-2(ad465) II</i>                 |
| <b>AA60</b>         | <i>daf-16(mgDf50) I</i>                |
| <b>AA4776</b>       | <i>N2; rmls132[P(unc-54) Q35::YFP]</i> |
| <b>AM141</b>        | <i>rmls133[P(unc-54) Q40::YFP]</i>     |

**Supplemental Table 10:** qRT-PCR primers

| Gene name             | Forward primer sequence | Reverse primer sequence |
|-----------------------|-------------------------|-------------------------|
| <b><i>dhfr-1</i></b>  | TTTCGGAGCCACCATTTGTG    | ACCAAGTTTTCTCGCAACGC    |
| <b><i>mel-32</i></b>  | TTGTTGACTTGCGCCCAATC    | TGGGCACGTATTCTTGTTGC    |
| <b><i>mthfr-1</i></b> | ATGGGGAAACAGTTCATCGC    | TTGATGAACACGCGCTTGAC    |
| <b><i>dao-3</i></b>   | ATCAATGCTGGACGTTTGGC    | TTCGAGCGTCCCAAACAAC     |
| <b><i>F38B6.4</i></b> | AGGTTTCTGCGTTGGCTTTC    | AACGTTTGTGGTCCTTTCCG    |
| <b><i>dapk-1</i></b>  | TGGCAACATTTGTGCACGAG    | ACTGTATGCTGAGCAAAGCG    |
| <b><i>ing-3</i></b>   | TACTGATGACACCGACGTTTCTC | ACACCACAAACGCCGAATTC    |
| <b><i>daf-18</i></b>  | AAATACGGCCGGTAACATGC    | TGGTCAACGAAGGCTTTTGC    |
| <b><i>let-23</i></b>  | CGCTGAAATGGTTGACATGC    | TTTGGTTTGCAGCTCGGATG    |
| <b><i>dgn-1</i></b>   | AAATCAAGAGGACGCAAGCC    | AGTGTGTTGGCTCCACATG     |
