# Supplementary material for: Regulation of the one carbon folate cycle as a shared metabolic signature of longevity
Source: PubMed Central journal article supplement (PMC8190293; doi:10.1038/s41467-021-23856-9), 2021-06-09
Supplement: 41467_2021_23856_MOESM3_ESM.pdf [file 41467_2021_23856_MOESM3_ESM.pdf]

## Description of Additional Supplementary Files

**File Name:** Supplementary Data 1

**Description:** Metabolomics raw data of longevity mutants, (linked to Figure 1a).

**File Name:** Supplementary Data 2

**Description:** Metabolomics raw data of dhfr-1i and metr-1i, (linked to Extended Data Figure 4c).

Metabolomics raw data of dhfr-1i and 5MTHF supplementation, (linked to Extended Data Figure 4a).
